# Supplementary material for: The kinematic analysis of the lower limb during topspin forehand loop between different level table tennis athletes
Source: PeerJ. 2021 Mar 12;9:e10841. doi: 10.7717/peerj.10841 (PMC7958893; doi:10.7717/peerj.10841)
Supplement: Supplemental Information 1 [file peerj-09-10841-s001.xlsx]

## Sheet: Hip x
Angle																	Mena	SD
24.2729	27.2188	30.3794	29.1852	17.3976	19.0886	23.4146	26.6796	25.6819	27.1806	29.2475	33.7801	26.3546	26.7363	31.3901			26.5338	4.31546
24.4629	28.2425	31.1921	30.2492	18.2753	19.7392	24.5036	27.5519	26.1487	27.5909	29.9013	34.2377	26.7314	27.3638	32.0247			27.2144	4.29392
24.6894	28.8635	32.6079	32.3	19.817	21.188	25.557	29.6501	27.7352	28.6359	31.6429	34.8431	27.0649	28.4747	32.9991			28.4046	4.2903
25.0911	29.5129	33.3671	33.1921	20.5375	22.0189	26.6633	30.8027	29.0822	29.1367	32.4694	35.4404	27.4029	28.9652	33.6636			29.1564	4.29886
26.1395	30.9365	34.0501	34.2447	21.3972	22.8695	29.0233	31.9747	31.2506	29.8293	33.4845	35.9675	27.9873	29.6645	34.2446			30.2043	4.2326
26.6328	31.839	34.767	35.0706	22.6209	23.907	30.2286	33.0801	34.3031	29.6866	34.5279	37.3096	28.2373	30.2189	34.9351			31.1576	4.34433
27.3406	32.8018	35.547	35.9686	23.3227	25.8454	31.3472	35.4975	36.6161	29.3436	35.5584	38.053	28.6468	31.7694	35.5756			32.2156	4.45267
28.0417	34.4272	37.2638	37.9045	24.0152	27.0715	32.5882	36.6119	40.4525	32.6782	37.8589	38.9065	29.127	32.5659	37.3468			33.7907	4.90475
28.8021	35.2993	38.1457	38.9946	24.9769	28.1281	33.8098	37.8717	44.9166	33.674	39.2313	39.9352	29.346	33.6081	38.3922			35.0088	5.40814
29.6616	36.932	39.0714	40.2522	26.3548	29.1497	35.0706	39.1581	49.4749	34.4575	40.5447	41.0225	29.7008	34.527	39.5221			36.3267	5.98711
30.5297	37.8619	40.1425	41.5579	27.1904	31.4225	36.3793	41.8522	52.5844	36.4287	41.9098	42.1831	30.3687	36.8644	40.8431			37.8746	6.35825
32.2432	38.8308	41.2283	44.1723	29.211	32.6896	39.0866	43.1515	56.9916	37.6188	44.8443	43.4798	30.6372	38.1854	43.552			39.7282	7.03808
33.2096	41.0222	43.3021	45.3969	30.181	33.6999	40.4245	44.5791	60.9377	38.6618	46.277	44.6852	30.8834	39.4722	44.8211			41.1702	7.70927
34.2023	42.1886	44.3509	46.7805	31.2188	36.2077	41.8573	47.4859	63.0557	39.8691	47.8109	45.8899	32.0389	40.9308	46.3938			42.6854	7.9216
35.136	44.4712	45.5421	48.0161	33.5027	37.4623	43.2125	49.12	65.2146	40.9348	49.1285	48.6043	32.4821	42.3781	47.6745			44.192	8.16029
36.2245	45.7613	46.5902	49.2933	34.5731	38.7769	44.8667	50.5355	66.9	43.3393	50.5932	49.9716	33.93	45.2833	49.0056			45.7096	8.2208
37.1556	46.9651	47.6237	51.7099	35.796	40.1663	46.2635	52.0025	67.9442	44.5318	53.5413	51.3041	34.6527	46.8279	51.8778			47.2242	8.44678
38.269	49.337	49.7369	53.0701	38.4216	42.9657	47.7539	55.016	68.0598	45.7916	54.9689	52.7982	35.5291	48.3443	53.3756			48.8958	8.20689
40.5576	50.4532	50.7183	54.3857	39.7298	44.4101	50.6626	56.3929	67.6482	47.1123	56.3441	54.0876	37.3528	49.7486	54.6277			50.2821	7.76504
41.7282	51.7816	51.8399	55.6482	41.3686	45.869	52.0732	57.8152	65.5867	49.7562	57.5721	55.5526	38.4014	52.865	55.8364			51.5796	7.24259
42.9754	54.3031	53.0053	57.9789	44.3876	47.2102	53.5865	59.1707	62.2171	51.1606	59.9859	56.9284	39.5386	54.2442	58.2068			52.9933	6.73762
44.1004	55.4552	55.1631	59.1003	45.9699	50.031	54.9348	61.4441	59.211	52.6516	61.2354	58.2576	41.8717	55.6285	59.2683			54.2882	6.20897
45.4312	57.7508	56.2006	60.0882	47.5891	51.578	56.3855	62.3366	54.136	53.9717	62.2986	59.5483	43.2596	57.1314	60.1575			55.1909	5.93435
46.5538	58.7378	57.1633	61.0509	50.7029	52.8879	57.705	63.0863	48.5554	56.6437	63.3816	61.8072	44.5534	59.7943	61.2005			56.2549	6.1528
47.8293	59.5996	58.2103	61.7078	52.2743	54.0957	58.929	63.8501	45.5145	57.8815	64.1813	62.8981	47.243	61.0805	62.3844			57.1786	6.29805
50.1398	61.4447	59.0749	63.1277	53.7319	56.7618	60.789	65.1134	43.1244	59.309	65.574	64.082	48.6476	62.1852	63.4801			58.439	6.70128
51.3508	61.7267	60.4439	63.6343	56.501	58.0599	61.6862	65.474	42.7301	60.4826	66.2976	64.5386	51.5107	63.5166	64.3763			59.4886	6.53789
52.6313	61.9982	61.1452	64.0608	57.7212	59.1229	62.2475	65.8999	41.5846	62.4806	66.7841	65.6497	52.8617	64.4894	64.77			60.2298	6.75177
53.7517	62.5222	61.7535	64.532	58.8157	60.0951	63.0045	66.1033	39.5043	63.4948	67.264	66.2819	54.2513	64.974	65.2032			60.7701	7.15735
54.845	64.0454	62.3217	64.9446	60.9069	61.786	63.4423	66.3073	34.9447	64.139	67.6629	66.8739	56.8341	65.4905	65.4762			61.3347	8.11845
55.9091	64.6588	62.7122	65.3478	61.1805	62.5836	63.8609	66.3184	29.6999	64.9028	67.9811	67.4103	58.224	67.0592	66.1093			61.5972	9.44943
57.0253	65.049	63.3595	65.7294	61.4729	63.2001	64.2254	66.3598	27.3746	65.9814	68.1516	67.9008	59.4442	67.9681	66.3593			61.9734	10.0855
58.8457	65.2264	63.5469	65.7864	62.1032	63.7185	64.672	66.3831	26.8195	66.3834	68.1976	68.3736	61.9898	68.2295	66.4637			62.4493	10.2051
59.7337	65.1935	63.8018	65.8579	62.3822	64.6946	64.8811	66.3903	27.265	66.7017	68.024	68.6515	62.419	68.5528	66.638			62.7458	10.1203
60.441	65.1819	63.8302	65.9757	62.6426	64.984	64.9685	64.3156	26.8452	66.8585	67.4991	68.7307	62.925	68.6765	66.4863			62.6907	10.1721
61.2542	65.2027	63.8013	65.3005	63.1459	65.0994	64.8212	63.5164	26.1914	67.192	67.4192	68.7031	65.9005	68.4684	66.2713			62.8192	10.3333
61.6803	65.2611	63.7397	64.7502	63.3881	65.1986	64.5635	62.5548	25.7178	67.1539	67.324	68.5332	66.6122	68.3626	65.8704			62.714	10.4316
62.4334	64.581	63.6834	64.1139	63.5925	65.465	64.252	60.1078	25.6578	67.0521	65.8621	68.4555	67.1814	68.1064	65.5121			62.4038	10.4
62.9187	63.3145	63.663	63.5059	64.0217	64.7956	63.6234	58.6968	25.7717	66.7902	64.9641	68.1846	68.1178	67.9476	65.37			62.1124	10.3492
63.6921	62.5498	63.6124	61.8168	64.232	64.3993	62.1123	57.1251	25.8729	66.5162	62.5038	67.6709	68.5025	67.7816	65.1088			61.5664	10.2847
63.8468	61.6902	62.3388	60.6884	64.413	63.3132	61.1356	53.7736	26.2967	66.1483	61.0688	67.5542	69.022	65.8937	62.7312			60.661	10.1526
64.174	59.5498	61.6621	59.5806	63.2493	62.5722	60.0762	52.1608	26.4584	65.039	59.4408	67.3244	69.0149	64.9161	61.7425			59.7974	10.0408
64.2011	58.1901	60.9718	58.3744	62.2349	61.7734	58.8316	50.473	26.4214	63.9641	57.6511	64.6916	68.9447	64.0601	60.5302			58.7542	9.8888
64.209	55.2395	60.2024	57.0088	61.1953	60.588	57.197	48.7486	26.4841	62.9944	54.0565	63.5533	68.615	62.8303	57.6923			57.3743	9.81967
64.1981	53.5836	59.144	56.9796	58.4502	57.8414	55.5486	45.7528	26.5413	60.3224	52.2721	62.0955	68.3181	59.94	56.2496			55.8158	9.64683
63.9904	51.9132	56.661	57.028	56.8975	56.2901	53.9565	44.7345	26.9206	58.9454	50.2924	60.6547	67.8272	58.3108	54.6137			54.6024	9.41275
63.3642	48.3255	55.1633	51.6886	55.3673	54.7334	50.5573	43.7732	27.2294	57.2583	48.1934	58.9477	67.443	56.2542	52.9263			52.7483	9.2364
62.8882	46.6094	53.6089	50.5411	52.2042	53.0402	48.8374	43.163	27.6639	55.4996	46.4722	57.0803	67.2451	54.3058	51.3264			51.3657	9.0022
62.2634	44.8493	52.0177	48.422	50.5281	49.714	47.2005	42.5662	27.8374	51.8357	43.7303	54.9918	64.7239	50.5915	48.1607			49.2955	8.53062
61.5969	42.0608	50.3618	47.6883	48.7395	48.0926	45.6981	42.4949	28.0345	49.9353	42.7276	53.1077	62.1737	48.4731	46.5271			47.8475	8.11162
60.6666	40.8695	46.8262	47.0798	45.5747	46.536	44.3064	42.44	28.2231	48.1106	42.1361	48.8113	60.7174	46.7229	45.1772			46.2799	7.64956
59.6829	39.3474	45.0073	46.7509	44.12	45.2602	43.1083	42.2588	28.4307	46.4524	41.7162	46.9606	57.2544	45.2092	43.9026			45.0308	7.09739
58.5633	38.7833	43.4066	46.5295	43.0646	43.4346	42.1957	41.4794	28.4712	43.7808	41.376	45.0834	55.3555	42.873	42.2297			43.7751	6.75437
57.2621	38.3898	41.8832	46.447	41.6678	42.8343	41.6517	40.3977	28.6124	42.7318	41.3084	43.4062	53.4453	42.2653	41.4962			42.9199	6.38129
54.5033	37.8986	40.5308	46.4096	41.3645	42.4945	41.0324	39.148	28.7928	42.0083	41.2314	42.0752	49.7426	41.932	41.1431			42.0205	5.60728
53.026	37.6508	38.3081	46.216	41.3829	42.2672	40.8385	37.6713	28.8105	41.5303	40.8067	41.2512	47.7608	41.8667	40.9144			41.3534	5.32322
51.2294	37.4153	37.5766	45.8853	41.2589	42.3114	40.8738	34.5908	28.7404	40.9557	40.0607	40.7762	46.1385	42.3461	40.972			40.7421	5.17142
49.3804	36.5194	37.2528	44.4658	41.2191	42.2267	40.6358	33.0798	28.7111	40.8076	37.6379	40.5269	43.3994	42.6383	41.0909			39.9728	4.89882
47.4559	36.0691	36.5887	43.3068	40.9664	41.9468	40.2048	31.3157	28.8177	40.6793	35.9277	40.3349	42.5242	42.7995	41.1105			39.3365	4.81693
45.7003	34.4422	36.5399	42.0074	39.7235	41.4679	39.6532	29.857	28.7873	40.5311	34.1682	40.6104	41.9855	42.6691	40.93			38.6049	4.83841
43.8911	33.2071	36.5102	40.4218	38.6884	39.492	38.756	27.4789	28.7211	39.1804	32.2537	40.4978	41.74	41.045	40.4493			37.4889	4.86839
40.1157	31.9968	36.2437	37.3338	37.3723	38.1109	36.3074	26.7842	28.764	38.1662	28.7271	40.1382	41.6099	40.1427	38.5639			36.0251	4.69374
38.5508	29.2243	35.8351	35.7341	34.3526	36.5169	34.9052	26.3484	28.7834	37.0428	27.2186	39.3697	41.8818	38.8622	37.1393			34.7843	4.73135
37.1785	27.9169	35.1582	34.3551	32.3982	32.9271	33.163	26.0465	28.7435	35.5658	26.1274	38.2613	41.5444	37.3212	35.427			33.4756	4.56953
36.0075	26.0754	33.3031	33.2183	30.6087	31.3405	31.3056	26.1394	28.7553	33.9745	25.2836	36.8945	41.0965	35.4731	33.4013			32.1918	4.40176
35.2315	25.5536	32.102	32.4072	27.3009	29.8929	29.5822	26.2241	28.7727	30.4907	24.9529	35.21	38.6784	31.6788	31.345			30.6282	3.84956
34.6369	25.2358	30.6625	31.34	25.9314	28.5081	27.984	26.1136	28.8235	28.8033	25.1811	33.3573	37.3269	29.8194	27.2463			29.398	3.56123
34.016	25.1023	29.0764	30.8293	25.3249	26.6934	26.6034	25.9769	28.8318	27.1878	25.4395	31.3709	35.6371	28.2195	25.5422			28.3901	3.27394
33.3109	25.0412	27.5957	30.4319	24.6227	26.2702	24.7363	25.922	28.8384	26.0074	25.6877	27.3764	31.6098	27.1083	24.2253			27.2523	2.70586
33.0391	24.9299	24.5768	30.1602	24.598	26.0135	24.2899	25.7286	28.8083	24.6934	25.977	25.8813	29.7937	25.9965	23.326			26.5208	2.70019
32.7388	24.5523	23.4931	29.4022	24.8273	25.9384	24.0504	25.6221	28.7477	24.6209	25.9764	24.4513	28.1915	25.9533	22.3054			26.0581	2.68521
32.1083	24.3554	22.6609	28.9585	25.0091	25.7245	23.942	25.5003	28.6706	24.7442	25.7896	23.5387	25.8213	26.0899	22.2263			25.676	2.57709
31.2127	23.9438	22.01	28.5471	25.1379	25.4849	23.8627	25.3818	28.6557	24.9884	25.6282	22.9854	25.1418	26.3717	22.172			25.4349	2.50438
30.1877	23.6602	21.7396	28.05	25.1379	25.3564	23.9081	25.3758	28.6397	25.2768	25.3036	22.9961	24.9631	26.6378	22.2618			25.2996	2.33584
28.7292	23.5319	21.2705	27.8626	24.898	24.9939	23.9218	25.4474	28.5676	25.4377	25.1409	22.9099	25.2417	26.3744	22.4142			25.1161	2.15933
25.5434	23.4454	21.197	27.1312	24.6016	24.4965	23.5908	25.8732	28.5101	25.421	24.8695	23.119	25.5492	26.2915	22.4108			24.8034	1.87128
23.7265	23.4286	21.2708	26.8063	24.4575	24.2681	23.4476	25.8437	28.5106	25.304	25.0959	23.3179	25.6606	25.8158	22.2481			24.6135	1.83033
22.0192	23.5903	21.2671	26.6138	24.1809	23.8984	23.3382	25.9937	28.4676	24.9788	25.119	23.816	25.6275	24.9369	22.4288			24.4184	1.85974
20.5092	23.8207	21.2316	26.6176	24.0442	23.6368	23.2261	26.018	28.4143	24.7746	25.5469	23.8634	25.3051	24.5176	22.2705			24.2531	2.03607
19.1556	23.9775	21.0954	26.526	24.0258	23.3837	23.0297	26.0726	28.3711	24.7666	25.85	23.7715	24.783	24.2113	22.2133			24.0822	2.24915
18.1664	24.3562	20.993	26.5153	24.1733	23.3008	23.0892	26.1674	28.3119	24.8294	26.2536	23.6683	24.5531	23.8551	22.221			24.0303	2.44248
17.514	24.6409	21.041	26.4011	24.2654	23.4839	23.034	26.2504	28.248	25.1391	26.3572	23.5862	24.1601	23.6121	22.2089			23.9962	2.56054
16.7165	24.8532	20.9404	26.2407	24.2579	23.3771	23.3839	26.3863	28.2355	25.2494	26.3214	23.575	23.746	23.6176	22.2302			23.9421	2.71307
16.6837	25.4504	21.1354	26.2794	24.5808	23.4848	23.4904	26.5322	28.2011	25.5017	26.4947	23.4802	23.8381	23.7151	22.3568			24.0817	2.74399
16.7972	25.792	21.3559	26.1964	24.5893	23.7625	23.7566	26.5168	28.1276	25.6992	26.4535	23.4218	23.6722	23.7045	22.6368			24.1655	2.69424
16.8167	26.1317	21.581	26.2414	24.6882	23.7349	24.0124	26.5558	28.0606	25.9549	26.5727	23.5356	23.7616	23.8911	22.9666			24.3003	2.68625
17.0261	26.7645	21.8701	26.0835	24.7319	24.0121	24.3206	26.6433	28.0504	26.0791	26.842	23.8496	23.9097	23.8915	22.9906			24.471	2.66351
17.2508	27.0361	22.2255	26.0852	24.912	23.9229	24.4816	26.7272	27.985	26.1836	26.8781	24.208	24.0009	23.919	23.2209			24.6025	2.60381
17.5067	27.7048	22.7472	26.2059	24.848	23.9326	24.7304	26.6976	28.0188	26.3656	26.9562	24.2222	24.3215	24.15	23.2791			24.7791	2.57647
18.2912	28.2605	23.1006	26.2286	24.8819	24.0277	25.4214	26.7174	28.065	26.3533	26.8006	24.6191	24.3442	24.0095	23.503			24.9749	2.4363
18.7476	28.5941	23.442	26.2905	24.8152	24.106	25.7142	26.888	28.0236	26.6256	26.8837	24.8782	24.5328	23.9385	23.6626			25.1428	2.37827
19.3858	29.6977	23.7227	26.3939	24.7958	24.1026	25.8732	27.0563	28.0083	26.5484	27.0324	25.0815	24.5125	23.9825	23.6738			25.3245	2.39101
19.9959	30.3404	24.045	26.2985	24.8507	24.1704	26.2073	27.0451	27.9671	26.7104	27.0288	25.1609	24.6099	23.765	23.5566			25.4501	2.377
20.5489	31.2985	24.6939	26.4287	24.7586	24.1942	26.509	27.2023	27.9436	26.9542	27.0976	25.4076	24.6849	23.7126	23.6425			25.6718	2.43973
21.4433	31.9817	25.0477	26.3772	24.7462	24.1174	26.8138	27.5409	27.9323	27.1476	27.1034	25.4712	24.7917	23.6143	23.6711			25.8533	2.45746
22.1553	32.329	25.3063	26.3285	24.8852	24.1319	26.8962	27.5845	27.9243	27.1754	27.217	25.776	24.8868	23.6751	23.673			25.9963	2.42234
23.7339	33.1269	25.6734	26.4069	24.8987	23.9731	27.1535	27.7905	27.9164	27.443	27.3857	25.7517	24.9815	23.5829	23.7269			26.2363	2.46408
24.5016	33.3527	25.9589	26.446	24.9631	23.9694	27.4431	27.7515	27.8747	27.5225	27.4261	25.7914	24.9654	23.6116	23.7813			26.3573	2.45747
25.4598	33.5596	26.6875	26.5693	25.0492	23.964	27.4429	27.9246	27.8384	27.7051	27.637	25.8515	25.0253	23.8234	23.625			26.5442	2.46328
26.4225	33.9715	27.1022	26.6239	25.0354	24.0749	27.4843	27.9306	27.8596	27.8494	27.5433	25.9371	25.1839	23.9301	23.6888			26.7092	2.50581

## Sheet: Hip y
Angle																	Mena	SD
-28.0228	-29.376	-28.9786	-28.4788	-25.9562	-28.4947	-28.3734	-33.1898	-31.8021	-33.0633	-35.1514	-35.2341	-30.6525	-33.9477	-37.202			-31.1949	3.29634
-27.9118	-29.5909	-28.8173	-28.4085	-26.4262	-28.6599	-28.2544	-33.0996	-32.0379	-33.3098	-35.2957	-35.1211	-30.9635	-34.26	-37.2371			-31.2929	3.28892
-27.8154	-29.3866	-28.3255	-27.9233	-27.0911	-28.6465	-28.144	-32.6878	-32.6657	-33.7294	-34.7555	-34.7882	-31.0495	-34.414	-36.9454			-31.2245	3.2306
-28.0518	-29.2722	-28.0499	-27.5942	-27.3687	-28.6109	-28.0041	-32.3736	-32.8432	-33.7855	-34.4622	-34.2554	-31.3195	-34.338	-36.6773			-31.1338	3.14738
-27.7957	-28.9536	-27.6857	-27.2301	-27.7219	-28.4422	-27.5929	-31.9962	-32.2844	-33.6571	-34.0651	-33.9233	-31.6979	-34.2822	-36.4085			-30.9158	3.12361
-27.7463	-28.7259	-27.4239	-26.882	-28.158	-28.4443	-27.2054	-31.5102	-31.1908	-33.961	-33.4923	-33.111	-32.0114	-34.321	-36.1219			-30.687	3.05967
-27.5879	-28.5417	-26.815	-26.4993	-28.3531	-28.1513	-26.9647	-30.5039	-30.1192	-34.5584	-32.9182	-32.6364	-32.391	-33.7059	-35.7536			-30.3666	3.0792
-27.3417	-27.8701	-25.8758	-25.5335	-28.5065	-27.9314	-26.6017	-29.7576	-28.0512	-32.5554	-31.698	-32.0985	-32.9994	-33.3344	-34.7809			-29.6624	2.99471
-27.1156	-27.4611	-25.3108	-25.0105	-28.9014	-27.6583	-26.1282	-29.137	-25.4075	-32.1773	-30.9183	-31.5088	-33.249	-32.967	-34.2002			-29.1434	3.15122
-26.7249	-26.6171	-24.8836	-24.5292	-28.697	-27.3741	-25.781	-28.39	-22.2281	-31.6494	-30.3064	-30.8308	-33.4099	-32.4572	-33.6108			-28.4993	3.46503
-26.5037	-26.0893	-24.247	-23.9614	-28.6823	-26.6011	-25.3447	-26.634	-19.7351	-30.7084	-29.3849	-30.0825	-33.8121	-31.4587	-32.8801			-27.7417	3.76146
-25.8806	-25.5775	-23.5959	-22.8724	-28.5203	-26.044	-24.2633	-25.7154	-16.1505	-30.015	-27.7035	-29.3527	-33.8962	-30.9068	-31.4728			-26.7978	4.30375
-25.2744	-24.3024	-22.3905	-22.1156	-28.2956	-25.7027	-23.5112	-24.7785	-13.4913	-29.5077	-26.685	-28.5531	-33.8478	-30.2897	-30.6227			-25.9579	4.79332
-24.9172	-23.5854	-21.5277	-21.2336	-28.1559	-24.5719	-22.8438	-22.7396	-12.4566	-28.8431	-25.4813	-27.6905	-33.7014	-29.4478	-29.6977			-25.1262	4.96456
-24.4462	-22.0668	-20.6787	-20.488	-27.4634	-23.8704	-22.0849	-21.7201	-12.2851	-28.1945	-24.303	-25.643	-33.5235	-28.8837	-28.631			-24.2855	4.93222
-23.8478	-21.2939	-19.9311	-19.5623	-27.1276	-23.1941	-21.2389	-20.4958	-11.6659	-26.8217	-23.0808	-24.5282	-32.8923	-27.1578	-27.4929			-23.3554	4.85621
-23.2075	-20.4055	-18.9801	-17.7562	-26.6412	-22.4065	-20.3553	-19.3453	-11.6349	-25.9455	-20.379	-23.3149	-32.5897	-26.1763	-24.7822			-22.2613	4.82737
-22.5028	-18.3925	-17.3335	-16.8065	-25.5887	-20.8501	-19.3767	-17.0516	-12.2316	-25.0855	-18.9989	-22.0377	-32.2605	-24.9772	-23.519			-21.1342	4.83101
-21.0156	-17.1996	-16.5094	-16.0078	-25.002	-19.978	-17.2945	-15.8957	-11.651	-24.1932	-17.7048	-20.6781	-31.4292	-23.701	-22.0937			-20.0236	4.83957
-20.1	-16.1371	-15.7733	-15.0681	-24.1817	-19.0824	-16.2863	-14.964	-16.6379	-22.1764	-16.2868	-19.348	-30.9725	-21.1621	-20.6837			-19.2574	4.29946
-19.116	-14.2646	-15.1169	-13.6784	-22.5515	-18.2572	-15.4308	-14.1529	-19.8957	-21.1956	-14.2114	-18.1548	-30.5699	-19.6597	-18.1952			-18.2967	4.40802
-17.9793	-13.3938	-14.1295	-13.0178	-21.737	-16.7582	-14.6427	-13.1794	-22.7424	-20.2553	-13.2197	-16.8489	-29.1465	-18.4008	-17.0999			-17.5034	4.50639
-16.9269	-11.8271	-13.7214	-12.4075	-20.7267	-16.1919	-14.0817	-12.8795	-27.73	-19.118	-12.6543	-15.5881	-28.2492	-17.1703	-16.3599			-17.0422	5.11367
-15.6475	-11.0792	-13.2966	-12.1631	-18.9687	-15.4295	-13.433	-12.8194	-32.5475	-17.1616	-12.346	-13.5257	-27.3456	-15.3426	-15.6702			-16.4517	5.93451
-14.6119	-10.4801	-12.8703	-11.8239	-18.1152	-14.8074	-12.8228	-12.9592	-35.0468	-16.3768	-11.9091	-12.6059	-25.5502	-14.7875	-15.3738			-16.0094	6.37581
-12.4462	-10.1824	-12.4625	-11.2898	-17.1994	-13.9136	-12.4427	-12.952	-36.2749	-15.5092	-12.0228	-12.0902	-24.4574	-14.3842	-15.6628			-15.5527	6.66858
-11.4924	-10.3759	-11.7383	-11.2966	-15.5437	-13.2513	-12.2044	-12.9628	-35.7398	-14.6567	-11.9594	-12.6082	-22.1568	-13.9197	-15.2075			-15.0076	6.38643
-10.7203	-10.5657	-10.9875	-11.3843	-14.919	-12.989	-11.9733	-12.9921	-35.5206	-13.7075	-11.8733	-11.8847	-20.9391	-14.7075	-15.0246			-14.6792	6.32714
-10.0045	-10.9016	-10.5383	-11.4481	-14.3496	-12.6517	-11.9872	-12.9351	-36.0006	-13.6309	-11.9215	-11.5444	-19.8915	-15.0486	-14.9883			-14.5228	6.42753
-9.44161	-9.70189	-10.2683	-11.5411	-13.8208	-12.1979	-11.8586	-13.2162	-37.5457	-13.6944	-11.8749	-11.3682	-17.5034	-15.376	-14.9573			-14.2911	6.80048
-9.01838	-9.49336	-10.1078	-11.7651	-13.8437	-11.8783	-11.7952	-12.8663	-38.061	-13.6549	-11.8384	-11.3005	-16.532	-13.5029	-14.8246			-14.0322	6.93992
-8.52085	-9.46744	-9.58434	-11.8993	-13.9015	-11.7166	-11.8535	-12.4562	-37.4767	-13.7391	-12.0571	-11.2096	-15.5447	-13.4135	-14.6673			-13.8338	6.82556
-8.28416	-9.71393	-9.56409	-11.5772	-13.9224	-11.345	-12.1062	-12.041	-36.0305	-13.9584	-12.2751	-11.1511	-14.1254	-13.2328	-14.8008			-13.6085	6.4722
-8.17803	-9.08849	-9.73925	-11.2609	-13.8696	-11.3535	-12.5876	-11.1314	-34.876	-14.1059	-12.5409	-11.1801	-14.5901	-13.226	-15.0383			-13.5177	6.24131
-8.05976	-8.75382	-9.8582	-10.4954	-13.8533	-11.4238	-12.4086	-16.423	-34.26	-14.1316	-13.8204	-11.3257	-15.0448	-13.3424	-15.7135			-13.9276	6.14908
-8.27675	-8.3771	-9.63446	-13.6587	-13.7046	-11.2276	-13.424	-17.5638	-34.0462	-14.403	-13.2386	-11.4712	-13.1362	-13.8124	-16.1315			-14.1404	6.08494
-8.04369	-7.67238	-9.16099	-14.3785	-13.5888	-11.0221	-13.8681	-18.6	-34.2373	-14.4868	-12.6025	-11.6584	-12.8719	-13.9965	-16.7421			-14.1953	6.29474
-8.34315	-11.9398	-8.93854	-15.1211	-13.4567	-10.5257	-14.502	-21.0026	-34.0309	-14.7048	-16.2537	-12.1508	-12.7754	-14.612	-17.4784			-15.0557	6.16593
-8.29798	-13.7064	-8.66995	-15.9873	-13.1531	-13.0711	-15.27	-22.5196	-33.7999	-15.1626	-17.6253	-12.6104	-12.7095	-14.0482	-16.939			-15.5713	6.10891
-8.36615	-14.7151	-8.41437	-17.8584	-12.9423	-14.3548	-17.3099	-23.8765	-33.2697	-15.6316	-20.0027	-13.2851	-12.5828	-13.4685	-15.778			-16.1237	6.18991
-8.46726	-15.8235	-11.9593	-18.9177	-15.6577	-15.7262	-18.3635	-27.1517	-32.811	-14.4398	-21.5007	-12.548	-12.6972	-17.6431	-21.1513			-17.6572	6.19862
-8.86753	-17.9884	-12.8255	-20.0408	-17.5169	-16.6062	-19.556	-28.7133	-32.6069	-17.6035	-23.0482	-11.0823	-12.8714	-18.3209	-22.2664			-18.6609	6.3168
-8.83789	-19.0828	-13.7193	-21.0713	-18.3805	-17.8884	-20.9141	-30.2018	-32.5312	-18.6968	-24.6828	-17.0152	-13.0984	-19.7495	-23.4789			-19.9566	6.13746
-9.10463	-21.7764	-14.6995	-21.582	-19.3585	-18.9653	-22.1962	-31.4931	-32.5806	-19.7376	-28.1438	-18.2638	-13.8905	-21.0672	-26.3813			-21.2827	6.39779
-9.40173	-23.3342	-15.7385	-20.8905	-21.724	-21.5775	-23.6073	-33.6461	-32.7415	-22.2114	-29.9606	-19.642	-14.4337	-23.9946	-27.9802			-22.7256	6.61629
-9.93811	-24.678	-17.9877	-20.203	-23.008	-23.0818	-25.2109	-34.5035	-32.8941	-23.7342	-31.641	-21.2179	-15.1754	-25.6305	-29.3728			-23.8851	6.63798
-10.9428	-27.4139	-19.3265	-26.8184	-24.3089	-24.7924	-28.1903	-35.1256	-33.1204	-25.3087	-33.2376	-22.7983	-14.0097	-27.0736	-30.9127			-25.5587	6.79423
-11.6482	-28.8021	-20.6777	-27.7528	-27.3144	-26.397	-29.6391	-35.4834	-33.2369	-26.8803	-34.8085	-24.3591	-13.4672	-28.5485	-32.4313			-26.7631	6.96885
-12.2654	-29.9235	-22.1105	-29.3462	-28.6738	-29.5731	-31.0048	-35.4804	-33.4239	-29.9521	-37.387	-25.8267	-18.7068	-31.8392	-34.6964			-28.6807	6.65878
-13.2067	-31.5986	-23.7447	-29.9203	-29.8701	-30.9087	-32.1415	-35.2936	-33.7727	-31.3224	-38.0937	-27.6299	-21.175	-33.1819	-35.7348			-29.8396	6.35144
-14.0988	-32.1681	-26.6864	-30.3747	-32.2268	-31.9223	-33.0541	-35.0911	-33.7515	-32.6955	-38.4987	-30.6773	-22.6014	-34.5921	-36.5151			-30.9969	6.03538
-14.8947	-32.7918	-28.1415	-30.7595	-33.0417	-32.7768	-33.8165	-34.9043	-33.6138	-33.9002	-38.553	-32.1583	-25.7745	-35.7184	-37.2238			-31.8713	5.68126
-16.0881	-32.8556	-29.4752	-31.02	-33.5746	-33.465	-34.2394	-34.8011	-33.5205	-35.711	-37.7169	-33.5358	-27.4106	-37.1274	-37.977			-32.5679	5.39912
-17.1718	-32.972	-30.6165	-31.0679	-34.1991	-33.5105	-34.5837	-35.0491	-33.5468	-36.3487	-37.2867	-34.7006	-29.1034	-37.1961	-38.0629			-33.0277	5.06772
-19.7363	-32.6626	-31.6548	-30.9679	-34.2663	-33.5085	-34.5021	-35.3501	-33.5679	-36.7822	-36.9508	-35.6046	-32.3131	-37.0266	-38.1229			-33.5344	4.36941
-21.1436	-32.8292	-32.816	-31.0016	-34.1476	-33.4019	-34.2619	-35.8404	-33.4559	-36.8884	-36.8144	-36.055	-33.7801	-36.6659	-38.0024			-33.8069	4.00253
-22.4866	-32.8554	-33.0347	-31.0806	-33.8887	-32.9065	-34.149	-37.0301	-33.4215	-36.6678	-37.1267	-36.2414	-35.1265	-35.2101	-37.8721			-33.9399	3.71926
-23.7515	-33.0986	-33.199	-31.6519	-33.7745	-32.8316	-34.0432	-37.5092	-33.388	-36.4373	-38.0973	-35.8942	-37.236	-34.574	-37.8506			-34.2225	3.55878
-25.2416	-33.335	-33.0087	-31.8723	-33.8201	-32.8719	-34.0148	-37.8578	-33.4535	-36.1636	-38.7951	-35.1805	-37.9158	-34.0933	-37.9674			-34.3728	3.35106
-26.6786	-34.048	-32.9532	-32.3707	-34.2455	-33.016	-34.2894	-38.0057	-33.4235	-36.0533	-39.347	-33.1912	-38.2179	-33.8006	-38.2449			-34.5257	3.1624
-28.0516	-34.3311	-32.6415	-32.8777	-34.7013	-33.5447	-34.516	-37.5623	-33.3257	-36.4634	-39.9394	-32.3295	-37.8888	-34.2748	-38.6409			-34.7393	2.99264
-30.4971	-34.6439	-32.6367	-33.9914	-35.0618	-34.1079	-35.5195	-37.4084	-33.4199	-36.9076	-40.187	-31.8495	-37.4053	-34.8288	-39.7056			-35.2113	2.72725
-31.5735	-34.9927	-32.5494	-34.2627	-35.9706	-34.7115	-36.1438	-37.0751	-33.4514	-37.4255	-39.9987	-31.7066	-36.9201	-35.6426	-40.1629			-35.5058	2.6181
-32.4495	-34.9604	-32.6279	-34.2615	-36.2996	-35.8018	-36.4297	-36.8205	-33.4412	-37.8343	-39.5038	-31.9369	-36.52	-36.5629	-40.7078			-35.7439	2.52885
-33.1922	-34.6686	-32.9891	-34.2381	-36.4977	-36.1197	-36.9456	-36.6506	-33.337	-38.2731	-38.9475	-32.3288	-36.6819	-37.1696	-41.1414			-35.9454	2.47923
-33.5851	-34.4451	-33.3214	-33.9523	-36.2643	-36.0811	-37.1535	-36.4439	-33.2696	-38.6706	-38.2796	-33.0769	-37.7434	-38.1521	-41.3727			-36.1208	2.47657
-34.2443	-34.2713	-33.512	-32.9094	-36.0387	-35.9384	-37.1122	-36.3367	-33.2549	-38.6669	-37.5091	-33.8175	-38.5222	-38.2608	-41.3072			-36.1134	2.45389
-34.5784	-33.8353	-33.7225	-32.4625	-35.5918	-34.8612	-36.9418	-35.974	-33.2499	-38.4715	-37.2255	-34.4406	-39.2461	-38.1752	-40.9578			-35.9823	2.45253
-34.8623	-33.6598	-33.807	-31.9935	-34.5004	-34.4891	-36.3308	-35.7794	-33.257	-38.0972	-36.9039	-35.0875	-40.2254	-37.9893	-40.5789			-35.8374	2.51105
-35.0641	-33.3636	-33.476	-31.6623	-33.9862	-34.0372	-36.1021	-35.4454	-33.2217	-37.3355	-36.6552	-34.9487	-40.4226	-37.489	-40.0459			-35.5504	2.4984
-35.2476	-33.067	-33.1848	-31.2307	-33.7178	-33.778	-35.7057	-35.3567	-33.1804	-36.9693	-36.1284	-34.5722	-40.2294	-37.1378	-38.9927			-35.2332	2.40165
-35.4176	-32.8301	-32.9879	-31.0131	-33.1798	-33.2886	-35.6029	-35.1439	-33.1384	-36.615	-36.0583	-34.0378	-39.1318	-36.8535	-38.4775			-34.9184	2.26894
-35.424	-32.6219	-32.6521	-31.0153	-33.0357	-33.1135	-35.3318	-34.9669	-33.1076	-36.3004	-35.7774	-33.3663	-38.4714	-36.5676	-37.9723			-34.6483	2.15119
-35.7863	-32.6005	-32.2864	-30.9172	-32.7465	-32.976	-35.1739	-34.8676	-33.065	-35.837	-35.7691	-33.0173	-37.8142	-36.1032	-37.6029			-34.4375	2.06614
-35.9617	-32.4164	-31.9284	-30.9266	-32.6147	-32.8422	-35.0222	-34.6796	-33.0413	-35.5444	-35.7059	-32.4666	-36.7827	-35.8823	-37.273			-34.2059	1.97825
-36.5315	-32.3322	-31.8085	-30.839	-32.3947	-32.7472	-34.6846	-34.3548	-32.9713	-35.3738	-35.7932	-32.211	-36.4423	-35.8044	-36.6738			-34.0641	1.97113
-36.5355	-32.3273	-31.6817	-30.8086	-32.2089	-32.6899	-34.5163	-34.1785	-32.9709	-35.0962	-35.694	-31.789	-35.9242	-35.4857	-36.3914			-33.8865	1.91728
-36.6301	-32.2674	-31.6487	-30.7203	-32.1722	-32.7369	-34.4643	-34.0312	-32.9803	-34.8075	-35.7368	-31.5495	-35.7581	-35.4535	-36.2624			-33.8146	1.92497
-36.4891	-31.7465	-31.4025	-30.5849	-31.9247	-32.6524	-34.3797	-33.8058	-33.0007	-34.6941	-35.8006	-31.4305	-35.5864	-35.3126	-36.0674			-33.6585	1.96539
-36.1942	-31.498	-31.2723	-30.5935	-31.9434	-32.5	-34.0947	-33.3884	-32.9908	-34.5993	-35.6253	-31.4158	-35.3924	-35.2738	-35.9125			-33.513	1.91498
-36.006	-30.9721	-31.0995	-30.4529	-31.8395	-32.3332	-33.9919	-33.255	-32.9829	-34.638	-35.5077	-31.4015	-35.3368	-35.1651	-35.6915			-33.3782	1.94316
-35.6229	-30.6327	-30.9065	-30.3852	-31.7185	-32.4637	-33.8809	-33.1888	-32.8776	-34.7306	-35.2996	-31.4172	-35.3036	-35.2037	-35.4876			-33.2746	1.93592
-34.9248	-30.2571	-30.7467	-30.2574	-31.6869	-32.2232	-33.603	-32.9009	-32.8213	-34.6874	-35.2501	-31.5148	-35.2088	-35.1982	-35.358			-33.1092	1.92297
-34.67	-29.819	-30.4454	-30.1042	-31.6768	-32.1045	-33.4858	-32.807	-32.7518	-34.6388	-35.0876	-31.6213	-35.2769	-35.1049	-35.347			-32.9961	1.97799
-34.3808	-29.6649	-30.3522	-29.8393	-31.5196	-32.0854	-33.306	-32.8202	-32.7421	-34.55	-34.9102	-31.6389	-35.1717	-34.99	-35.1699			-32.8761	1.96959
-34.2168	-29.4122	-30.1703	-29.8165	-31.5714	-31.858	-33.038	-32.8324	-32.7097	-34.3341	-34.9739	-31.7763	-35.0912	-34.8102	-35.0982			-32.7806	1.97227
-33.9326	-29.1593	-30.0021	-29.6757	-31.4275	-31.7616	-32.8319	-32.7146	-32.7467	-34.1115	-35.0789	-31.8116	-34.9937	-34.7765	-34.9882			-32.6675	2.00418
-33.5286	-29.0744	-29.8409	-29.66	-31.3463	-31.7168	-32.6405	-32.8173	-32.7202	-34.0855	-35.082	-31.9576	-34.7897	-34.5419	-34.8712			-32.5782	1.97231
-33.1119	-29.1363	-29.5191	-29.6181	-31.501	-31.7054	-32.424	-32.9018	-32.7233	-33.9613	-35.054	-31.8818	-34.6052	-34.4963	-34.9081			-32.5032	1.96365
-32.1887	-29.1239	-29.366	-29.6217	-31.4457	-31.6196	-31.9661	-32.9389	-32.6498	-33.8721	-35.0172	-31.8589	-34.3467	-34.2659	-34.8012			-32.3388	1.92822
-31.5671	-29.2211	-29.2163	-29.6472	-31.4118	-31.7596	-31.7536	-33.0478	-32.6213	-33.7338	-35.0732	-31.8775	-34.2955	-34.3731	-34.8691			-32.2978	1.95321
-31.1955	-29.52	-29.0218	-29.5872	-31.4347	-31.8924	-31.5702	-33.0367	-32.6397	-33.7631	-35.1301	-31.7605	-34.2363	-34.3865	-34.7947			-32.2646	1.9623
-30.6806	-29.6151	-28.935	-29.75	-31.556	-31.9567	-31.4641	-33.0367	-32.6373	-33.9079	-35.0054	-31.6819	-34.1954	-34.3965	-34.7098			-32.2352	1.95853
-30.221	-30.03	-28.8715	-29.6623	-31.6193	-31.936	-31.3194	-33.0929	-32.5976	-33.9394	-34.975	-31.6515	-34.2329	-34.4271	-34.7192			-32.2197	1.97741
-29.9772	-30.1134	-28.784	-29.7266	-31.6404	-32.0568	-31.1881	-33.0881	-32.5742	-34.0832	-35.0516	-31.6707	-34.3082	-34.4616	-34.7873			-32.2341	2.0277
-29.7013	-30.0203	-28.8465	-29.783	-31.6611	-32.0899	-31.2395	-33.1187	-32.5248	-34.1693	-34.9987	-31.8828	-34.3601	-34.5095	-34.8267			-32.2488	2.05169
-29.096	-30.0792	-28.974	-29.8937	-31.6252	-32.1657	-31.3558	-33.0544	-32.519	-34.1983	-34.9139	-32.0318	-34.4982	-34.4962	-34.8248			-32.2484	2.07932
-28.7981	-30.1266	-29.0439	-29.8989	-31.6307	-32.2017	-31.4544	-32.9988	-32.5149	-34.3351	-34.9363	-32.1845	-34.5415	-34.4045	-34.8918			-32.2641	2.1098
-28.6014	-30.1114	-29.3658	-29.9659	-31.5612	-32.2731	-31.6114	-32.891	-32.4862	-34.4833	-34.8171	-32.3033	-34.6025	-34.3931	-34.8541			-32.2881	2.09144
-28.2518	-30.3404	-29.5302	-30.0395	-31.5039	-32.2923	-31.6686	-32.9401	-32.4809	-34.4441	-34.8658	-32.4411	-34.7144	-34.4411	-34.9418			-32.3264	2.12246

## Sheet: Hip z
Angle																	Mena	SD
19.6782	19.683	20.6791	20.1313	18.9316	16.0488	20.8202	21.4688	19.6081	19.2302	21.4769	21.165	17.871	19.7425	19.5162			19.7367	1.42289
19.7936	19.8813	21.2527	20.3849	19.3699	15.9342	21.1344	21.6591	19.9235	19.3668	21.4666	21.3375	17.7637	20.2491	19.9322			19.9633	1.51506
19.9375	20.3743	22.2012	21.3743	20.0015	16.326	21.3923	22.2224	20.6586	19.6087	22.3893	21.7177	17.8825	20.5596	20.6733			20.488	1.65138
20.0207	20.4794	22.8693	21.7734	20.3327	16.7489	21.6774	22.6875	21.3786	19.9828	23.0343	22.3197	18.1776	20.6848	21.2395			20.8938	1.73531
20.5223	21.0016	23.1363	22.5991	21.0636	16.9378	22.2592	23.2845	22.6451	20.3304	23.3466	22.645	18.25	21.019	21.4262			21.3644	1.84738
20.633	21.2396	23.4977	23.001	21.335	17.5043	22.5337	23.6673	23.9518	19.0474	23.9485	23.7085	18.46	21.6105	21.885			21.7349	2.0753
21.261	21.6958	24.1165	23.7536	21.8119	18.4592	22.9202	24.7922	25.0486	16.2751	24.6754	24.4012	18.921	22.1862	22.1549			22.1649	2.58473
21.409	22.5685	25.102	24.4133	21.7594	19.2754	23.3049	25.2585	26.769	21.8665	25.7274	24.724	19.1953	22.5071	23.3782			23.1506	2.23865
21.6363	23.156	25.4734	24.5308	20.7623	19.9633	23.7339	25.6755	27.7266	22.49	26.2998	25.1864	19.2501	22.8548	23.9209			23.5107	2.41365
21.9373	24.2991	25.7555	24.7749	22.3138	20.6431	24.1979	26.2236	28.2888	22.8356	26.9034	25.7758	19.6692	23.3771	24.5084			24.1002	2.35594
22.5583	24.7703	26.1441	24.9791	22.3927	22.3813	24.4996	26.7458	28.928	23.9331	27.4774	26.2723	20.1744	24.3726	25.0741			24.7135	2.25287
23.3573	25.3882	26.6262	25.5476	23.0474	23.5055	24.7319	26.6271	31.2414	24.6532	28.4675	26.8482	20.4445	24.8014	26.6782			25.4644	2.52765
23.7819	26.0058	26.9448	25.7732	23.272	23.994	24.8394	26.6788	33.6723	25.1642	28.7191	27.3157	20.4569	25.4842	27.1224			25.9483	2.92815
24.1787	26.2765	27.02	26.1195	23.9936	25.7683	24.801	27.2426	34.545	25.5156	28.6569	27.4613	20.781	26.0475	27.6715			26.4053	2.94626
24.6292	26.7896	27.3143	26.6445	24.7174	26.2982	24.8772	28.0924	34.1197	26.0637	28.1354	27.9522	20.9871	26.7022	28.1205			26.7629	2.77374
25.1005	27.1892	27.596	27.2537	25.264	27.1792	25.2172	28.5588	33.3777	27.0628	27.8248	27.6134	22.0573	27.9702	27.9828			27.1499	2.39723
25.6319	27.388	28.0326	28.5666	25.8412	27.4446	25.7176	29.2685	33.6988	27.2566	27.7386	27.2989	22.2204	28.2167	28.5244			27.523	2.42006
26.1676	28.2067	29.1719	29.2571	27.0074	28.1136	26.4612	31.4067	34.5031	27.2914	28.1473	27.4106	22.7271	28.4128	28.7533			28.2025	2.56924
26.3605	28.4568	29.8567	29.8715	27.2483	28.2409	28.3914	32.2328	36.0994	27.6648	28.6995	27.4317	23.8408	28.3203	28.7042			28.7613	2.72906
26.7791	29.126	30.6235	30.3384	27.2676	28.3784	29.4377	33.2284	35.8007	27.3494	29.57	27.7649	24.4208	28.5023	29.1101			29.1798	2.70453
27.2446	30.8209	31.5558	31.8063	27.3587	28.4548	30.4499	33.9984	35.5879	27.2494	31.4948	28.4922	25.1657	28.7702	29.9742			29.8949	2.77127
27.5185	31.7082	32.9656	32.4359	27.5492	29.1454	31.4024	34.7867	34.7999	27.7619	32.8549	29.5721	25.7743	29.2846	30.6087			30.5445	2.75283
27.9446	33.1612	33.5936	32.7805	27.8257	29.6649	32.2124	34.7657	33.0622	28.4319	33.6754	30.7454	26.4208	30.078	31.5135			31.0584	2.55669
28.4137	33.4164	33.8126	33.0171	28.9799	30.2246	32.9039	34.7485	30.4027	30.0234	34.4686	33.3167	26.6784	31.9106	32.4468			31.6509	2.40265
28.8699	33.6174	33.8097	32.5921	29.9585	31.079	33.2943	34.0718	28.6439	31.1406	34.5351	34.3018	26.8631	32.8513	33.0668			31.913	2.37378
30.085	33.2297	33.8002	32.2967	30.69	31.9315	33.2765	33.5644	27.3835	32.3877	33.5719	34.7846	26.8546	33.3294	33.0643			32.0167	2.32015
30.7428	32.4647	33.4907	32.3075	32.3398	32.8365	33.2688	33.3444	27.5823	33.1823	33.2668	34.0136	26.6959	34.6569	33.0928			32.2191	2.24539
31.6387	31.8569	33.5199	31.9196	32.8931	33.0938	33.0631	33.2819	27.4611	33.8899	32.9407	33.9831	26.8489	33.9417	33.0455			32.2252	2.18538
32.3906	31.1373	33.6608	32.0422	33.4654	33.2839	32.807	33.1145	26.4883	33.8163	32.6831	33.4486	27.2125	33.5347	32.9214			32.1338	2.25902
32.9094	32.0694	33.818	32.3709	34.1455	33.435	32.4845	33.6202	23.9058	33.3901	32.6508	33.1339	28.6706	33.0917	32.8066			32.1668	2.61131
33.1443	32.5683	33.7407	32.8683	33.4258	33.462	32.6747	33.9692	21.0287	33.1915	33.0208	32.6933	29.6583	33.9204	32.6402			32.1338	3.23536
33.5708	32.9282	34.1705	33.4002	32.8312	33.3166	32.7373	34.6081	19.6443	32.5799	33.392	32.3395	31.0835	33.6894	32.5218			32.1876	3.56833
33.3823	33.1294	33.8433	33.5738	31.6216	33.1882	33.0426	35.2029	19.1863	32.3935	33.7639	32.4189	33.201	33.8479	32.5922			32.2925	3.71789
33.1956	33.9039	33.8414	34.06	31.3788	33.3473	33.3783	36.6672	18.7792	32.3165	34.1061	32.6775	33.1825	34.1486	32.8876			32.5247	3.97339
33.0008	34.2771	33.6254	35.1335	31.3194	33.5341	33.9601	34.7708	18.4997	32.4114	34.7602	32.9019	32.9181	34.4056	33.6056			32.6082	4.03115
32.9179	34.8719	33.7968	34.1893	31.7715	33.8472	34.1591	34.9591	18.3022	32.9066	35.2744	33.2313	33.664	34.98	33.6224			32.8329	4.12795
32.5898	36.0127	34.4013	34.1581	32.4096	34.2692	34.2274	34.9716	17.9448	33.1379	35.9531	33.4772	33.3729	34.8967	33.8198			33.0428	4.30873
32.7412	34.5731	34.9199	34.0779	33.2029	35.2731	34.446	34.3032	17.6787	33.5344	35.3012	33.6669	32.8207	34.8625	33.8445			33.0164	4.32076
32.981	34.6413	35.3321	34.3334	35.0743	34.3767	34.633	33.9934	17.6069	33.6122	35.2353	33.983	32.5808	35.4316	34.4598			33.2183	4.39603
33.3486	34.6613	36.0207	33.7775	36.0004	34.0457	34.1132	33.4472	17.7267	33.7406	34.6956	34.0237	32.2474	35.8943	35.9459			33.3126	4.45651
33.6708	34.6588	34.7557	33.6012	35.3758	34.7577	33.8888	32.0604	18.0893	34.9219	34.2295	34.5403	32.8239	35.3413	34.0268			33.1162	4.25378
33.8376	34.1092	34.4691	33.3304	35.2509	35.088	33.8807	31.3701	18.7136	34.2442	33.7955	35.8923	33.062	35.5723	33.9555			33.1048	4.13241
33.8892	33.691	34.5759	32.9955	35.0811	34.9782	33.5777	30.4571	18.5857	33.9268	33.5473	34.3862	33.4207	35.5631	33.7396			32.8277	4.11006
33.9181	32.7126	34.3793	33.6774	35.0274	34.9612	33.0099	29.2237	18.6671	34.0425	32.3943	34.1726	33.7271	35.5687	33.1583			32.576	4.125
34.2756	32.435	34.3019	34.9718	34.0148	34.3081	32.5531	27.491	18.6359	33.49	31.8484	34.0058	33.661	34.9629	32.7145			32.2447	4.18788
34.2857	31.2474	33.8597	35.8677	33.6272	33.863	31.8413	26.9479	18.4552	33.3714	30.8866	33.7342	33.9662	34.5873	32.0041			31.903	4.27521
34.3409	29.633	33.4155	30.0319	33.1202	33.2996	30.6487	26.3552	18.2019	32.9779	29.6467	33.3973	35.2665	33.816	31.1281			31.0186	4.24861
34.3356	28.6011	32.847	29.4834	31.9183	32.85	29.7261	25.9308	18.4808	32.3794	28.7109	33.2403	36.1043	33.1806	30.3611			30.5433	4.23554
34.5008	27.5558	32.1266	28.1675	31.0357	31.2277	28.5994	25.6688	18.8514	31.1979	26.8225	32.5629	34.4738	31.665	28.7195			29.545	3.97425
34.3921	26.1384	31.6787	27.6813	30.147	30.2308	27.8215	25.6534	18.6991	30.4978	26.0668	31.939	33.6474	30.2078	27.1756			28.7984	3.90023
34.0741	25.6075	29.9341	27.4026	28.3901	29.2199	26.9719	25.8584	18.7458	29.2926	25.2923	29.9417	33.1605	29.0801	26.2751			27.9498	3.6169
33.9602	25.0923	28.8346	27.1763	27.3399	28.5391	26.2984	25.8718	18.9351	28.3244	25.1963	28.8939	32.3914	27.8094	25.6824			27.3564	3.41133
33.6842	24.9109	27.8855	27.4999	26.5361	27.329	25.5765	25.7777	18.7633	26.6612	24.9043	27.5876	31.4735	26.1881	25.4863			26.6843	3.2523
33.2857	25.0258	27.0649	27.3663	25.5635	26.9954	25.4221	25.2067	18.6418	25.9672	25.2415	26.4723	30.7878	25.6405	25.3221			26.2669	3.1232
32.2941	25.1847	26.1233	27.3757	25.4422	27.1453	25.0782	24.7908	18.7418	25.5556	25.2853	25.4353	28.9386	25.3295	25.6881			25.8939	2.7883
31.915	25.0597	25.226	27.0939	25.625	27.1175	25.1936	23.8942	18.9143	25.5261	25.524	24.673	27.6068	25.2299	25.881			25.632	2.64194
31.0769	24.884	25.068	27.1352	26.1171	27.2917	25.4771	22.3936	18.8657	25.3297	25.1459	24.3536	26.6437	25.6776	26.2189			25.4453	2.60325
30.2466	24.2781	25.3196	26.0908	26.2251	27.249	25.4465	21.5197	18.6719	25.5086	24.1479	24.1441	25.3866	26.0793	26.8213			25.1423	2.59532
29.2031	24.1873	24.9567	25.3739	26.0173	27.0143	25.2555	20.4536	18.6761	25.7002	23.2794	24.3786	25.3989	26.1975	26.5577			24.8434	2.56036
28.1072	23.1892	25.0661	24.6936	25.472	26.593	25.1177	19.54	18.6773	25.5742	22.2474	25.2477	25.4945	26.4783	26.2529			24.5167	2.592
27.1034	22.4956	25.3188	23.8982	24.6607	25.3461	24.792	18.0702	18.8536	25.0569	21.0992	25.6776	26.2015	25.9683	25.8072			24.0233	2.70571
24.8808	21.8497	25.2612	22.4327	23.9535	24.4207	23.4159	17.6416	18.9643	24.649	18.5132	25.725	26.3991	25.8646	24.2261			23.2132	2.79353
24.0958	20.2162	25.25	21.6944	22.2107	23.7367	22.6854	17.2711	18.9631	24.0998	17.3095	25.5308	26.9819	25.5264	23.1436			22.581	2.99666
23.2621	19.4835	24.7487	21.2719	20.9712	22.0335	21.6689	16.736	18.9211	23.2936	16.6193	25.3128	27.6141	24.814	21.9315			21.9121	3.1087
22.581	18.3492	23.9629	20.5984	20.2377	21.0578	20.4617	16.7822	18.8092	22.5271	16.0776	24.816	27.454	23.728	20.5695			21.2008	3.06747
22.3769	17.8343	23.4179	20.3794	18.572	20.4423	19.4746	16.777	18.7973	20.3903	15.9549	24.3241	26.0805	21.2702	19.3411			20.3622	2.78741
22.0178	17.7741	22.5331	20.0007	17.9175	19.6982	18.4619	16.5618	18.9474	19.234	16.2387	23.598	25.366	20.3028	16.6838			19.689	2.68964
21.7423	17.5862	21.5969	19.51	17.7875	18.9408	17.692	16.6515	19.0134	18.1343	16.4554	22.4684	24.36	19.3466	15.7454			19.1354	2.44431
21.6496	17.459	21.0112	19.2266	17.4961	18.7144	16.7613	16.5932	19.0115	17.2921	16.6036	20.2514	21.722	18.4011	15.2101			18.4935	1.98474
21.2814	16.9613	19.2601	19.0472	17.354	18.5159	16.5803	16.6542	18.9814	16.469	16.7385	19.3394	20.3185	17.6239	14.8953			18.0014	1.709
21.1957	16.7005	19.0304	18.3902	17.3255	18.3531	16.3856	16.6025	18.9751	16.4079	16.6244	18.4358	19.2392	17.3409	14.33			17.6891	1.64341
20.8933	16.6874	18.5975	18.2594	16.9602	17.8348	16.1674	16.9849	18.9438	16.4292	16.2933	18.137	17.7205	17.3528	14.311			17.4382	1.50419
20.5221	16.614	18.2915	17.9797	16.964	17.4985	15.9085	16.953	18.9807	16.451	16.6481	17.7856	17.2438	17.2704	13.9746			17.2724	1.45807
19.9037	16.4083	18.0482	17.9289	16.9303	17.3316	15.8359	16.9422	19.0004	16.2921	16.3636	17.804	16.9583	17.0592	13.9758			17.1188	1.38126
19.4121	16.708	17.3013	18.1241	17.0342	17.1757	15.5551	17.1295	19.0271	16.2617	16.4966	17.8007	16.674	16.9306	13.865			17.033	1.33273
17.7968	16.8184	16.8841	18.2788	17.2194	17.2049	15.1205	17.6863	19.0569	16.2115	16.5812	17.7901	16.7435	17.0307	13.6973			16.9414	1.28135
16.778	16.7139	16.7599	18.2098	17.2876	17.3129	15.4522	17.6136	19.0658	16.1423	16.9178	17.6881	16.229	17.0186	13.5965			16.8524	1.25187
15.9179	16.9672	16.5527	18.1785	17.5149	17.2779	15.3936	17.7757	18.9661	16.2117	16.9372	17.3324	16.2874	16.904	13.9745			16.8128	1.19619
15.2559	17.035	16.2868	18.405	17.3257	17.3194	15.7098	17.8658	18.9342	16.2848	17.4724	17.1499	15.9457	17.2276	13.9065			16.8083	1.27696
14.8479	17.0839	16.1419	18.2979	17.4845	17.4928	15.7382	17.9895	18.8213	16.3943	17.6725	16.7019	15.8462	17.1069	14.2635			16.7922	1.26821
14.5885	17.1769	16.1265	18.3063	17.2099	17.2112	15.9709	17.9554	18.801	16.5009	17.8038	16.9885	15.7549	17.0941	14.669			16.8105	1.22387
14.4355	17.4192	16.3531	18.0016	17.0929	17.3263	15.9247	18.0302	18.8545	16.8504	17.9191	16.8323	15.609	16.8154	14.8672			16.8221	1.22136
14.061	17.5498	16.4684	17.7668	17.1369	17.2529	16.1333	18.1003	18.9436	16.949	17.6513	17.1216	15.6144	16.8723	15.0107			16.8422	1.24196
13.9594	17.3951	16.7325	17.7954	17.0112	17.445	16.1827	17.8547	18.946	17.2095	17.653	17.2903	15.9062	17.0258	15.2429			16.91	1.20139
13.6706	17.6444	16.8235	17.5176	17.0065	17.6477	16.4864	17.5998	18.9377	17.3927	17.2424	17.4966	15.858	16.7151	15.4106			16.8967	1.21912
13.53	17.873	16.9692	17.6008	16.8941	17.5786	16.6015	17.5069	18.8753	17.2717	17.2232	17.6471	15.7771	17.4227	15.748			16.9679	1.23092
13.2441	18.0748	17.2479	17.6964	16.7987	17.9968	16.8037	17.4613	18.7594	17.5788	17.227	17.7842	15.844	17.5529	15.6362			17.0471	1.32718
13.1499	18.2927	17.5507	17.4985	16.9304	17.8989	16.8625	17.6619	18.7515	17.1486	17.2686	18.0007	16.0446	17.7402	15.6072			17.0938	1.35615
13.1628	18.7646	17.5861	17.5997	16.8434	17.7633	17.0429	17.5684	18.7736	17.1817	17.418	17.9321	16.0881	18.1002	15.3185			17.1429	1.42071
13.3277	18.9149	17.6698	17.7235	16.8343	17.9417	17.5415	17.9557	18.8238	16.7489	17.479	18.121	16.1981	17.7764	15.0237			17.2053	1.45503
13.582	19.0995	17.7626	17.8072	16.7652	17.8691	17.5923	17.5615	18.8191	16.8933	17.7582	18.191	15.9623	17.5907	15.0152			17.2179	1.43346
14.1785	18.9817	18.1277	18.1587	16.7793	17.6714	17.5762	17.6353	18.8592	16.5461	17.9746	18.3753	15.7463	17.3321	14.9364			17.2586	1.39332
14.5278	19.1136	18.0677	18.0686	16.9026	18.0143	17.772	17.3338	18.8742	16.68	18.1749	18.3249	15.8792	17.0319	14.7387			17.3003	1.37258
14.8513	19.2664	17.9429	18.2194	16.7809	18.1774	17.7942	17.3676	18.8923	16.7732	18.2126	18.4413	15.7473	16.886	14.9301			17.3522	1.35002
15.196	19.5623	17.696	18.1222	16.7807	18.1044	17.8953	17.4302	18.8672	17.1246	18.1446	18.2241	15.8219	16.8114	14.8423			17.3749	1.31202
15.7322	19.6329	17.6744	17.9207	17.0582	18.0306	17.6032	17.1968	18.8605	17.1813	18.0643	17.9586	16.0862	16.9281	15.0138			17.3961	1.17375
16.6723	20.3479	17.5042	17.5418	16.8735	17.8881	17.643	17.6213	18.9026	17.4153	18.094	17.7843	16.2141	17.0182	15.3714			17.5261	1.13988
16.9848	20.4336	17.2503	17.4107	16.7663	17.8183	17.8783	17.5026	18.9147	17.6505	17.8482	17.4616	16.3027	16.9829	15.4081			17.5076	1.13222
17.396	20.7351	17.0379	17.1802	16.6523	17.6558	17.486	17.5433	18.9083	17.7141	17.8504	17.5955	16.4507	17.3953	15.2418			17.5228	1.1923
17.7617	21.1255	17.0378	17.203	16.5942	17.5742	17.5877	17.4837	18.9603	17.6097	17.6747	17.5277	16.7265	17.6011	15.3771			17.5897	1.23979

## Sheet: Knee x
Angle																	Mena	SD
27.7924	32.4761	32.367	31.2992	20.5071	23.4083	22.8178	34.4893	31.1154	35.2182	35.2139	37.4583	29.9022	30.6787	40.9031			31.0431	5.59279
28.0303	32.4516	32.5532	31.7842	21.3779	24.4019	23.1827	34.5249	31.6809	35.7954	35.4301	37.307	31.0452	30.876	40.8037			31.4163	5.34525
28.1013	32.3738	32.8915	32.8405	23.1322	26.0062	23.4961	34.9048	32.9632	36.6495	35.4371	36.9953	31.7454	31.33	40.2438			31.9407	4.92727
28.1885	32.4243	32.9785	33.2334	23.806	26.6326	23.8765	35.0085	33.3858	36.8116	35.2574	36.5003	32.4536	31.4499	39.7333			32.116	4.66158
28.5728	32.5086	33.3801	33.6156	24.2716	27.4144	24.8897	35.1553	33.6179	37.0553	35.3018	36.1369	34.082	31.3612	39.5669			32.462	4.41407
28.7826	32.8015	33.6104	34.0049	25.5064	28.0009	25.5557	35.3204	34.2208	37.1448	35.3085	35.2128	34.7927	30.998	39.25			32.7007	4.09696
28.9069	33.0876	33.9081	34.2294	26.0272	29.1159	26.1115	35.9535	34.8862	37.3503	35.1438	34.7975	35.4307	30.826	38.8697			32.9763	3.91304
29.2149	33.7728	34.8893	35.6275	26.7342	29.6106	26.6954	36.3329	36.6354	37.0541	35.4242	34.6944	36.4889	30.6479	38.2456			33.4712	3.84793
29.5379	34.2487	35.4418	36.6897	27.9373	30.2216	27.5999	36.8009	39.6924	37.1405	35.5689	34.9053	36.8228	30.5745	38.2663			34.0966	3.89538
29.7941	35.0201	36.1819	37.8887	28.4092	30.707	28.4719	37.3251	43.5268	37.3202	35.8329	34.9286	36.9315	30.6117	38.1871			34.7424	4.29012
29.9397	35.6206	36.8857	39.1811	28.9753	31.5671	29.518	39.1278	46.144	37.6978	36.0784	35.2078	36.9451	31.092	38.4141			35.493	4.64405
30.5003	36.2666	37.5427	41.7791	30.0309	32.0582	32.308	40.2696	48.8005	37.9992	37.0001	35.6095	36.6353	31.522	38.655			36.4651	4.94533
30.9199	38.2173	39.306	43.1213	30.74	32.7048	33.8453	41.619	50.8923	38.4503	37.7773	35.999	36.475	31.8282	38.985			37.3921	5.31524
31.2841	39.4303	40.3512	44.3682	31.2461	33.8078	35.4967	44.2575	52.4417	39.0227	38.9414	36.5852	36.0661	32.3844	39.4977			38.3454	5.66991
31.7155	41.6864	41.3503	45.2689	32.8144	34.6946	37.1229	45.46	54.9474	39.3735	40.4656	38.371	35.6312	32.9519	40.0734			39.4618	6.03586
32.1991	42.7333	42.3204	46.4251	33.5641	35.3652	38.8454	46.7342	57.3384	40.6255	41.9419	39.9096	34.7151	34.4019	40.9683			40.5392	6.46535
32.7079	43.8844	43.2579	48.2142	34.4374	36.3864	40.2601	47.7041	58.8933	41.5423	44.7315	41.5493	34.3922	35.6039	42.7922			41.7571	6.79365
33.2633	45.9147	44.8971	49.1551	36.1775	38.461	41.554	49.2536	59.5353	42.7056	45.8838	42.9437	34.1131	36.8557	43.8704			42.9723	6.82656
35.082	46.9565	45.6225	50.1008	37.3201	39.6555	43.6777	49.9406	60.3521	43.7064	46.9415	44.2939	33.589	38.3898	45.1336			44.0508	6.78412
35.9257	47.9018	46.407	51.0972	38.941	40.8106	44.6686	50.6283	61.2778	46.5187	47.6293	45.5572	33.278	41.475	46.0557			45.2115	6.76516
36.8352	49.4065	47.0837	52.7627	41.9129	42.0393	45.6619	51.3693	62.0284	47.9582	48.6705	46.5825	33.122	42.6863	47.7747			46.3929	6.81235
37.7757	49.9619	48.6998	53.6114	43.4208	44.2641	46.645	52.8447	62.3982	49.079	49.1058	47.297	33.5145	43.7821	48.3788			47.3853	6.72352
38.8942	51.252	49.3893	54.4521	44.9658	45.395	47.534	53.5786	62.6554	49.9686	49.6957	47.8268	33.883	44.7562	48.8274			48.205	6.63222
39.8538	51.9731	50.2698	55.3316	47.476	46.348	48.6132	54.3072	62.8117	51.5974	50.2326	48.4381	34.6252	46.4401	49.4367			49.1836	6.45911
40.877	52.6562	51.3217	56.2454	48.468	47.1639	49.6944	55.1987	63.013	52.1577	51.0466	48.9083	36.9439	47.2211	50.2096			50.075	6.11188
42.617	54.1102	52.1399	57.9896	49.6026	49.0816	51.8857	56.6237	63.8621	52.8661	53.0781	49.5221	38.3967	47.9572	51.5258			51.4172	6.03164
43.4616	54.6666	53.5494	58.7054	51.5633	49.8553	52.8414	57.1933	64.3114	53.563	54.0447	50.4072	41.688	48.5439	52.5522			52.4631	5.58024
44.216	55.1943	54.1717	59.3473	52.4234	50.6965	53.7496	57.8198	63.1971	55.2114	54.8804	51.3628	43.1272	50.1659	53.3209			53.259	5.15997
44.9694	56.093	54.6714	59.8965	53.2407	51.5589	54.7141	58.2438	61.367	56.3119	55.7512	52.282	44.3696	51.0293	54.1831			53.9121	4.73084
45.7674	56.5277	55.0998	60.3207	55.062	53.1565	55.4167	58.9789	58.5814	57.2477	56.4856	53.0648	46.1893	51.9616	54.921			54.5854	4.16981
46.721	56.9939	55.512	60.9248	55.7481	54.014	55.956	59.3236	55.9775	58.1677	57.4601	53.8672	46.8254	52.8934	56.1971			55.1055	3.963
47.6724	57.2146	55.908	61.2513	56.4583	54.7917	56.4623	59.6567	54.5595	59.8863	57.9321	54.5961	47.148	54.2518	56.7361			55.635	3.9325
49.6832	57.2814	56.1972	61.6252	57.9668	55.5493	57.2981	60.2267	52.5228	60.6269	58.3289	55.4164	48.2088	54.7406	57.2034			56.1917	3.77299
50.6677	57.579	56.4456	61.919	58.606	56.8112	57.756	60.8142	50.5443	61.1962	58.684	55.8807	48.9017	55.1392	57.6421			56.5725	3.89835
51.5066	57.8294	56.5523	62.6488	59.2234	57.3093	58.0075	61.0971	48.1221	61.5892	59.4292	56.1656	49.772	55.5501	58.0297			56.8555	4.20359
52.4149	58.0931	56.6057	62.9443	60.274	57.732	58.4779	61.4796	46.5146	62.4009	59.9452	56.5314	51.85	56.106	58.2748			57.3096	4.36486
53.1651	58.7741	56.6528	63.2009	60.7121	58.1488	58.8512	61.8823	44.6385	62.7102	60.4846	56.8385	52.8433	56.5711	58.5258			57.6	4.7114
53.876	58.6598	56.6605	63.4975	61.0852	59.1314	59.2106	62.6277	42.9977	62.8921	60.9283	57.3587	53.9109	56.9287	58.8455			57.9074	5.06797
54.5092	58.8926	56.7789	63.6637	61.9613	59.5517	59.507	62.8852	41.7993	63.0123	61.3545	57.7247	55.4213	57.1728	59.0782			58.2208	5.32828
55.7342	59.018	56.7978	64.1327	62.4351	60.0444	60.2674	63.2036	39.7791	63.2087	62.2014	58.2605	56.2104	57.4848	59.7405			58.5679	5.85421
56.1231	59.145	56.5091	64.255	62.6896	60.9342	60.6979	63.5454	38.0326	63.5861	62.7331	58.8384	57.0254	57.9867	59.7216			58.7882	6.33819
56.6263	59.5473	56.5529	64.4523	63.1514	61.3111	61.0458	63.7248	36.4481	63.8879	63.0592	59.9817	57.2475	58.108	59.9098			59.0036	6.78944
57.1433	59.594	56.4783	64.7701	63.191	61.8958	61.3305	63.9647	35.9395	63.926	63.2204	60.1259	57.5043	58.3598	59.9104			59.1569	6.95762
57.5926	59.9052	56.4968	65.0427	63.2297	62.2514	61.4902	64.1804	35.1255	64.012	63.7698	60.5673	58.112	58.4741	59.844			59.3396	7.20836
57.9832	60.0091	56.5362	65.1104	63.4553	63.2392	61.7245	64.6492	34.5879	64.2489	63.9919	60.9446	58.4972	58.847	59.8583			59.5789	7.42008
58.3983	60.3254	56.7549	65.5221	63.3889	63.6392	62.0381	64.9589	34.6667	64.3126	64.1749	61.4379	58.6642	58.9111	59.9106			59.8069	7.46161
59.1507	60.6377	56.9257	65.4405	63.3822	64.0625	62.0301	65.2297	35.0403	64.34	64.2811	61.7648	59.212	58.9254	59.9251			60.0232	7.3903
59.4109	60.9417	57.0745	65.6068	63.2563	64.3138	62.4986	65.6305	35.1638	64.4585	64.5382	61.8005	59.525	58.9202	59.9441			60.2056	7.41475
59.7427	61.1493	57.3457	65.998	63.3666	65.0002	62.7458	66.1734	35.0332	64.3946	65.1236	61.9793	59.6322	59.0152	60.2362			60.4624	7.5459
60.0992	61.74	57.4649	66.1299	63.2958	65.3279	62.9494	66.3727	35.2398	64.4412	65.6353	62.2873	60.2208	59.057	60.5822			60.7229	7.55369
60.5057	62.0032	57.8091	66.2701	63.5449	65.7189	63.0726	66.4736	35.3647	64.6443	66.234	62.4978	60.4362	59.287	60.7446			60.9738	7.58571
60.7294	62.6943	58.0069	66.5463	63.607	65.9582	63.3215	66.4445	35.326	64.8744	66.4185	62.714	60.4875	59.6334	60.7817			61.1696	7.64051
61.0036	62.9743	58.2269	66.6965	63.9803	66.7177	63.612	65.7116	35.2659	65.4061	67.3013	62.8471	60.6091	60.2942	60.6998			61.4231	7.73428
61.2041	62.9654	58.3809	66.8023	64.5795	67.0933	63.799	64.8289	35.3446	65.6178	67.3976	63.0044	60.642	60.7405	60.7143			61.541	7.73315
61.7208	63.0339	58.6868	66.9144	64.7857	67.2052	64.241	63.878	35.4361	65.8405	67.5247	63.2443	60.7969	61.2733	60.5114			61.6729	7.72161
61.9076	63.064	59.0186	66.9664	65.0194	67.4369	64.2553	63.0048	35.4156	66.1979	67.0803	63.6553	60.8641	61.655	60.5629			61.7403	7.72209
62.0302	63.0318	59.2067	66.7187	64.9426	67.8292	64.1054	61.3322	35.417	66.4001	66.5973	63.8442	61.1437	62.3291	60.6163			61.703	7.70267
62.1351	62.5207	59.3518	65.9802	64.7896	67.8455	63.8754	60.7644	35.5392	66.4032	64.9968	64.184	61.4514	62.4266	60.5373			61.5201	7.57167
62.2466	62.1356	59.4124	65.4114	64.5395	67.7172	63.4978	60.1465	35.7344	66.2729	63.9932	64.1943	61.4853	62.4922	60.7257			61.3337	7.44325
62.4544	61.0793	59.5867	64.7032	63.434	67.4275	62.8974	59.645	35.7621	66.0682	62.9945	64.214	61.6325	62.2005	60.6587			60.9839	7.31635
62.5317	60.3559	59.4512	63.9621	62.6934	66.4345	62.0361	58.6467	35.6774	64.7667	62.0042	63.8572	61.9059	60.6996	60.4175			60.3627	7.13491
62.5017	59.6291	59.0767	62.5619	61.9172	65.7256	60.2801	58.2262	35.7445	63.881	60.8751	63.3416	61.917	59.8964	59.4166			59.666	6.92393
62.5603	58.234	58.4441	61.8542	60.2038	64.9098	59.4038	57.7657	35.9841	62.9486	60.4145	62.5626	62.0897	58.9866	58.7387			59.0067	6.70507
62.5579	57.662	57.944	61.2597	59.5311	63.3143	58.4415	57.2197	36.0248	61.9175	59.9708	61.4264	61.5655	58.1628	57.996			58.3329	6.47998
62.5183	56.5802	56.3393	60.6548	58.8273	62.8034	57.7029	56.8531	36.1443	60.8446	59.4431	60.1936	61.1274	57.3921	57.1244			57.6366	6.31886
62.6269	56.2433	55.4212	60.1257	57.4525	62.325	57.0499	56.5691	36.2969	59.097	58.9564	58.6292	59.7106	56.5394	56.2123			56.8837	6.09873
62.6648	55.7414	54.6289	59.0693	56.6754	61.6579	56.2719	56.0694	36.259	58.5442	58.0176	57.1549	58.9837	55.9418	54.7074			56.1592	5.97681
62.4563	54.6136	53.9172	58.4671	55.9369	60.5048	55.4711	54.9172	36.262	57.911	57.4935	55.8866	58.1544	55.6001	54.0199			55.4408	5.82663
61.9785	53.9264	53.1705	57.7719	54.5662	60.0242	53.8585	54.3223	36.2143	57.4195	56.964	53.8036	56.8841	55.4071	53.4683			54.652	5.70943
61.7773	53.4323	51.9264	57.0605	54.0003	59.5667	53.0617	53.517	36.2367	56.4585	56.5349	52.9123	56.3889	54.6464	53.0363			54.0371	5.62392
61.3719	51.485	51.2384	55.6381	53.564	59.1215	52.3695	52.7857	36.1859	56.1087	55.1651	52.0921	55.7681	54.4487	52.2118			53.3036	5.52638
60.8629	50.4796	50.7735	54.7481	52.617	58.1867	51.7854	51.3993	36.1098	55.7916	54.4584	51.3891	54.7087	53.8647	51.7471			52.5948	5.39739
60.1499	48.4876	50.2973	54.0924	51.9912	57.6152	51.2221	50.7024	36.0439	55.3205	53.291	50.7407	54.1675	53.505	51.4953			51.9415	5.31773
59.4665	47.541	49.8813	53.0624	51.2956	57.0134	50.664	50.0374	36.0287	54.1416	52.4257	50.0327	53.7587	52.6275	50.9921			51.2646	5.15909
58.3529	46.3123	49.0728	52.1493	49.5152	56.226	50.1065	49.4036	35.9578	53.5483	51.4762	49.1596	53.1575	51.75	50.6601			50.4565	5.00868
56.4419	44.2456	48.6725	49.9896	48.5493	54.5046	48.6692	48.0847	35.8808	52.8806	49.9562	48.5739	52.7111	50.954	49.1428			49.2838	4.74488
55.6418	43.2462	48.166	49.1261	47.6362	53.6407	47.7294	47.4518	35.8412	52.0364	49.4255	48.0437	51.6072	49.8411	48.4433			48.5251	4.57665
54.8821	42.0742	47.7169	48.4079	45.93	52.8215	46.7227	46.7144	35.8318	50.4268	48.9552	47.1792	50.9479	47.9064	47.7412			47.6172	4.43726
54.152	39.8037	47.1943	47.5101	45.3472	52.1653	45.6944	45.8075	35.7583	49.5058	48.4821	46.5696	50.2942	46.8443	46.8858			46.801	4.48097
53.3328	38.7163	45.7715	46.9248	44.5886	50.8451	44.5809	44.26	35.7564	48.8283	48.0582	46.1615	48.6408	46.0654	46.005			45.9024	4.32819
52.5936	36.678	44.9766	45.5637	43.6131	50.5917	43.6527	43.6185	35.6764	48.287	47.3506	45.3748	48.0984	45.1528	44.5495			45.0518	4.45082
51.954	35.6462	44.1442	44.8243	43.1099	50.1734	42.66	42.9049	35.5957	47.2545	46.717	44.8985	47.4054	43.9453	43.7968			44.3353	4.43215
50.6407	34.8712	43.1767	44.1164	42.487	49.6799	41.1166	42.3565	35.4759	46.7324	46.1665	44.0625	46.0212	43.4113	43.0367			43.5568	4.31714
50.1109	33.7725	41.4696	43.4229	41.7549	48.6476	40.1323	41.2958	35.3768	46.1493	45.7327	43.3781	45.4207	42.7457	42.278			42.7792	4.34382
49.686	33.2073	40.5603	42.2149	41.2062	48.2949	39.1993	40.8902	35.219	45.4461	44.7867	42.5752	44.8775	42.3715	41.3013			42.1224	4.3299
48.8859	32.7862	39.6827	41.4777	40.8398	47.7908	38.3657	40.5046	35.1682	44.6462	44.3551	42.1704	44.3366	40.8708	40.5608			41.4961	4.24706
48.2273	32.3133	38.7537	40.5207	40.1401	47.1789	37.4912	40.1901	35.1774	43.9617	44.0813	41.3877	43.983	40.2569	39.953			40.9078	4.20536
47.3643	32.0532	37.7949	39.9581	39.7025	46.2575	36.5752	39.0255	35.0934	43.6898	43.7598	41.0846	43.6663	39.694	39.6968			40.3611	4.13043
46.4718	31.8841	36.0639	39.3009	39.4137	45.8359	35.7007	38.6573	35.0955	43.3221	43.3241	40.6891	43.1541	39.2943	39.2833			39.8327	4.10206
44.3902	32.1932	35.2875	38.2191	38.6799	45.4689	34.2606	38.0206	35.0818	43.1104	42.5837	40.4964	42.7727	39.0732	38.8409			39.2319	3.92735
43.1919	32.2642	34.4417	37.6756	38.4027	44.8854	33.5468	37.7559	35.0291	42.4444	42.1831	40.113	42.5701	38.5344	38.5541			38.7728	3.80922
41.8855	33.4445	33.5856	37.074	38.0053	44.651	32.9369	37.5965	34.9208	42.1918	41.8233	39.6866	42.4161	38.4739	38.2927			38.4656	3.65769
40.6613	33.9886	32.9378	36.5682	37.3517	44.1758	32.417	37.5774	34.8471	41.9203	41.2767	39.337	42.3017	38.2958	37.9813			38.1092	3.55573
39.2829	35.0182	32.2314	35.6361	37.1906	43.7956	32.0046	37.4631	34.7628	41.7519	40.5405	39.0468	42.1883	38.1247	37.4164			37.7636	3.47486
38.1414	35.4668	32.1028	35.3261	36.9306	43.0113	31.7987	37.3435	34.7603	41.2804	40.2089	38.8454	42.1353	37.7259	37.3901			37.4978	3.31795
36.7642	35.9476	31.9114	34.9717	36.4526	42.7237	31.4659	37.2686	34.6886	40.9804	40.0113	38.5807	41.958	37.5015	37.0473			37.2182	3.29289
33.7608	36.4291	31.968	34.8499	36.2738	42.3158	30.904	36.992	34.6996	40.8278	39.8603	38.4389	41.8095	37.1242	36.7132			36.8645	3.37913
32.2014	36.71	32.0529	34.5952	36.1883	42.1591	30.666	36.8638	34.6833	40.5757	39.6513	38.5698	41.6009	37.0319	36.6963			36.683	3.46598
30.9222	36.9762	32.4042	34.2279	35.892	41.6205	30.6263	36.8651	34.6631	40.3502	39.3199	38.456	41.4602	36.664	36.4743			36.4615	3.47526
29.7756	37.3839	32.6003	33.9003	35.7206	41.5594	30.4876	36.6871	34.6485	40.4011	39.0069	38.5016	41.2011	36.4232	36.407			36.3136	3.59448

## Sheet: Knee y
Angle																	Mena	SD
25.484	28.6577	26.6402	27.4131	26.575	23.7667	24.8212	27.8712	29.8622	28.3568	29.6267	28.3916	29.0365	29.2391	30.3648			27.7404	1.93862
25.4002	28.2746	26.766	27.4108	26.9021	23.7272	24.8282	27.7397	30.1375	28.4498	29.4668	28.2725	29.1453	29.3658	30.2984			27.7457	1.94167
25.3256	28.2768	26.8076	27.6414	27.0956	23.8448	24.8828	27.5469	30.3007	28.4206	29.2525	28.2766	29.2221	29.0921	30.0756			27.7375	1.8872
25.5163	28.0501	27.0057	27.7948	27.1352	23.952	24.978	27.5225	30.35	28.4899	29.2265	28.216	29.3828	28.8735	29.8616			27.757	1.81787
25.3201	27.8685	26.7933	28.1473	27.3442	23.8481	25.3723	27.6449	30.1358	28.4142	28.9761	28.094	29.1964	28.7921	29.4363			27.6922	1.72735
25.2343	27.6033	26.8176	28.3266	27.2258	23.9828	25.5113	27.808	29.6148	28.0242	28.7075	28.0567	29.2122	28.8218	29.2872			27.6156	1.62517
25.352	27.6295	26.8099	28.7105	27.3168	23.942	25.8507	28.2031	29.5342	27.116	28.7224	28.1073	29.2506	28.3187	29.0103			27.5916	1.57022
25.2341	27.6073	26.7174	28.8169	27.2249	24.0418	26.0902	28.3882	29.5385	28.1787	28.8574	28.0679	28.8824	28.0185	28.8681			27.6355	1.53207
25.1607	27.7411	26.6484	28.6504	26.8845	24.0259	26.2639	28.5681	28.4463	28.1738	29.0926	28.1656	28.6102	27.8395	28.7627			27.5356	1.46259
25.1505	27.9027	26.53	28.5767	27.0802	24.0429	26.4675	28.8133	27.0741	28.1584	29.3224	28.5876	28.4495	27.7129	28.8319			27.5134	1.47691
25.3246	27.9749	26.4198	28.4524	27.0186	24.2461	26.5374	28.525	26.4891	28.3551	29.5865	28.8486	28.0027	27.5795	28.8143			27.4783	1.45732
25.3754	28.0265	26.3573	28.3279	27.009	24.4094	26.1526	28.0908	27.2055	28.5953	29.6124	29.1813	27.8612	27.4915	29.3031			27.5333	1.48035
25.3908	27.9015	25.8593	28.2521	26.8731	24.4504	25.8723	27.5914	28.8443	28.8534	29.3355	29.295	27.4139	27.5863	29.4816			27.5334	1.56692
25.3931	27.7253	25.5265	28.142	27.1404	24.8252	25.479	26.8705	29.5804	28.8739	28.6962	29.0506	26.9104	27.6571	29.4692			27.4227	1.576
25.4538	27.5243	25.2923	28.4289	27.1401	24.9219	25.11	26.8923	29.4409	29.1913	27.7369	28.3272	26.6841	27.7795	29.4311			27.2903	1.55755
25.4691	27.5297	25.0161	28.5021	27.4512	25.2089	25.056	26.723	28.7269	29.431	27.0509	27.5057	26.4125	27.68	29.0762			27.1226	1.46693
25.5088	27.365	24.8954	28.8714	27.6351	25.1829	25.0927	26.9021	28.9316	29.2181	26.0896	26.6567	26.2067	27.3182	28.7137			26.9725	1.48552
25.5308	27.0775	25.0168	29.2	27.9852	25.2457	25.2358	27.9853	29.2573	28.8038	26.0183	26.1571	26.2797	26.9721	28.552			27.0212	1.51218
25.0293	26.9027	25.1577	29.4516	27.9554	25.18	25.9822	28.5472	29.4453	28.6488	26.0438	25.6746	26.8575	26.3897	28.1913			27.0305	1.56113
24.7974	27.002	25.509	29.6598	27.5787	25.2141	26.5385	29.3303	29.2592	27.5675	26.5752	25.5381	27.402	25.6152	28.1703			27.0505	1.56915
24.6703	27.8375	25.8984	30.7619	26.8688	25.0948	27.2111	29.9475	29.2138	27.148	28.0726	25.8043	28.0126	25.2796	28.5686			27.3593	1.81041
24.2596	28.4446	26.5369	31.1519	26.6625	25.3943	27.8738	30.8999	29.1786	27.2996	29.2739	26.4107	28.5436	25.3441	29.0034			27.7518	2.01296
24.0774	29.2384	26.8883	31.4288	26.4409	25.827	28.5104	31.1364	29.5191	27.4844	30.0554	27.1885	28.7346	25.6824	29.8813			28.1395	2.13438
23.9365	29.3007	26.9185	31.6901	26.4995	26.2987	29.0363	31.2457	29.7536	28.5616	30.8542	29.2503	28.5902	26.9668	30.6419			28.6363	2.1575
23.8614	29.3409	26.6368	31.4416	26.9765	26.9773	29.5416	30.9207	29.4188	29.5753	31.0808	30.2994	27.7678	27.9291	31.2432			28.8674	2.14133
24.0018	28.9929	26.4365	31.0394	27.3213	27.7976	29.7345	30.8018	28.6308	30.661	30.6575	30.8227	27.2506	28.5578	31.9326			28.9759	2.14767
24.2838	28.4534	26.0784	30.9851	28.344	28.5208	29.8977	30.7198	28.3001	31.4199	30.402	30.6946	26.0955	29.6388	32.1334			29.0645	2.22365
24.8222	28.0186	25.9702	30.8386	28.7503	28.8019	29.8561	30.6753	29.5286	32.6786	30.2514	30.9298	25.8808	29.8228	32.2703			29.273	2.29446
25.3335	27.4948	25.9075	30.9389	29.2808	28.9715	29.7853	30.6069	31.302	32.9301	30.0852	30.6656	25.8573	29.7819	32.3316			29.4182	2.32949
25.8411	27.6762	25.9853	31.1708	29.8754	29.1897	29.7413	30.9947	33.8956	32.854	30.0326	30.429	26.6158	29.6759	32.4418			29.7613	2.4214
26.1446	27.8869	25.8371	31.4804	29.3196	29.1266	29.9927	30.9768	35.264	32.968	30.0902	30.3171	27.3671	29.9174	32.6075			29.9531	2.55459
26.5229	28.0082	26.0045	31.8052	28.9089	28.9776	30.1598	31.1445	35.4569	32.7391	30.296	30.2065	28.4791	29.655	32.5915			30.0637	2.4691
26.6772	28.0423	25.7218	31.5788	27.9261	28.7876	30.6309	31.2027	35.2869	32.7977	30.3746	30.3841	30.5472	29.7754	32.7732			30.1671	2.49245
26.7992	27.8829	25.6235	31.6607	27.6075	28.7508	30.8318	31.672	34.7428	32.8697	30.5692	30.5225	31.0205	29.8799	33.0426			30.2317	2.51062
26.7967	27.7674	25.4543	31.7829	27.4897	28.8258	31.1648	31.384	34.4916	33.2341	30.7769	30.6484	31.3019	30.0044	33.6416			30.3176	2.60687
26.7614	27.8023	25.3456	31.4829	27.5637	28.7862	31.2926	31.5328	34.6876	33.6247	30.7097	30.809	31.7732	30.1594	33.6612			30.3995	2.68674
26.6731	27.9894	25.287	31.4535	27.87	28.8254	31.2532	31.7576	34.707	33.8457	30.7067	30.9752	31.538	29.7936	33.9017			30.4385	2.71442
26.8658	28.0489	25.4598	31.2341	28.3212	28.9268	31.3784	31.6877	33.9633	34.0081	30.5402	30.8248	31.1867	29.6528	33.7579			30.3904	2.54381
27.0766	28.1319	25.493	31.3741	29.4385	28.8447	31.4403	31.9103	33.381	33.9297	30.5261	30.802	31.1473	29.5644	33.9137			30.4649	2.43464
27.2194	28.2106	25.7682	31.0444	29.9251	28.6048	31.1608	31.9196	32.5226	33.8651	30.2024	30.6357	30.9469	29.3424	34.2794			30.3765	2.33271
27.4824	28.3571	25.8289	31.1434	30.4335	28.7994	31.0881	32.198	31.7279	33.7992	30.1305	30.3916	31.4917	29.3069	34.142			30.4214	2.23888
27.4995	28.5995	25.7723	31.2389	30.3126	29.0583	31.1941	32.3984	31.4567	33.4781	30.1882	30.2174	31.747	29.3906	34.338			30.4593	2.22267
27.4236	28.7251	26.0885	31.2366	30.3662	28.956	31.2517	32.4245	31.0712	33.2747	30.5686	30.0274	31.9596	29.4941	34.5197			30.4925	2.18504
27.3315	29.2473	26.2151	32.1511	30.5443	29.1062	31.2963	32.1087	30.8679	33.2673	31.1688	29.8692	32.1853	29.7343	35.1361			30.682	2.25077
27.3711	29.9307	26.4391	32.8629	30.5948	29.0302	31.4233	31.7722	30.7827	33.357	31.6471	29.8959	31.9647	29.8717	35.5478			30.8328	2.28522
27.226	29.9507	26.9174	33.126	30.87	29.1169	31.4117	31.6204	30.5775	33.6657	31.8662	29.9543	32.147	30.1152	35.711			30.9517	2.29959
27.0159	30.5941	27.1289	31.8441	31.1712	29.1753	31.9201	31.3492	30.3979	33.8355	31.9178	30.2056	32.364	30.2635	35.8773			31.004	2.26984
26.9449	30.687	27.3714	31.7613	31.7263	29.3352	31.7793	30.9112	30.5856	33.9212	31.8422	30.725	32.7009	30.5835	36.2059			31.1387	2.29241
27.0561	30.8023	27.6416	31.2287	31.9084	28.9725	31.597	30.2972	30.969	34.3812	31.5028	30.9874	32.5423	31.0641	36.4683			31.1613	2.33441
27.1027	30.9364	28.0532	30.886	32.1224	28.7018	31.5862	30.0809	31.0239	34.5238	30.9653	31.3558	32.7578	30.8721	35.8999			31.1245	2.25273
27.0048	30.9797	28.4648	30.7264	32.0441	28.2578	31.3503	30.1293	31.1462	34.1517	30.3031	32.1303	32.8207	30.6955	35.6589			31.0576	2.21578
27.1775	30.8409	28.5509	30.3467	31.7658	27.9735	31.1264	30.2493	31.2763	33.826	30.058	32.3792	33.928	30.2473	35.5295			31.0184	2.26607
27.1833	30.6296	28.6982	30.2014	31.2298	27.2887	30.6606	30.9756	31.2081	32.9937	29.1958	32.2993	34.1754	29.4464	35.6827			30.7912	2.35001
27.3592	30.668	28.8573	29.9022	30.3369	27.0162	30.4891	31.5954	31.1425	32.4368	29.2831	32.2209	34.695	28.8126	35.6043			30.6946	2.40311
27.7182	30.5377	28.8941	29.7834	29.9403	27.1341	29.6787	32.653	31.1795	31.8649	29.3375	31.7646	35.4603	28.1783	35.8806			30.667	2.55772
28.1421	30.4028	29.1576	29.7222	29.7512	27.0302	29.5559	33.461	31.2941	31.3624	30.1873	31.1592	35.3671	27.5676	35.8652			30.6684	2.57444
28.4451	30.3495	29.1764	30.1224	29.7938	27.0962	29.6714	35.5864	31.3163	30.3495	30.7057	30.6731	35.3042	26.6312	35.8736			30.7397	2.82343
28.8486	30.857	29.3407	30.6935	30.0688	27.2921	29.8157	36.4119	31.2796	30.1713	32.7809	29.8097	35.07	26.6136	36.3656			31.0279	2.96092
29.1852	31.391	29.1612	31.1915	30.1656	27.6704	30.1516	37.188	31.401	30.1192	33.9508	29.3544	35.0961	26.5982	36.2754			31.26	3.08198
29.5167	32.7257	29.086	31.8288	31.2893	28.1978	30.6584	37.7231	31.5219	30.1059	35.056	28.5906	34.9784	27.3263	36.471			31.6717	3.14639
29.9154	33.4361	29.2923	32.6417	31.8938	29.7289	31.5496	38.4046	31.6744	31.314	36.1213	28.7224	34.5747	29.1288	36.8533			32.3501	2.99328
30.6381	34.1738	29.6531	34.0182	32.5877	30.6297	33.1483	38.4958	31.9236	32.2006	37.1496	28.8638	34.3649	30.3794	37.8477			33.0716	2.96994
31.1018	35.35	30.1242	34.5458	34.2007	31.787	34.0004	38.4595	31.9865	33.2484	37.2772	29.1711	34.4527	31.717	38.3156			33.7158	2.82685
31.3253	35.9708	30.5134	35.2142	34.7314	33.9861	34.7769	38.0599	31.978	34.4897	37.4034	29.9393	34.9074	32.9376	38.6162			34.3233	2.62387
31.5864	36.6225	31.7759	35.5969	35.5477	34.8009	35.3085	37.961	31.8884	35.6202	37.4092	30.8625	35.2423	33.686	39.1302			34.8692	2.47583
31.8483	36.6393	32.4423	35.9457	36.4056	35.4828	35.7485	37.8403	31.8514	37.34	37.4484	32.0753	36.3968	34.6265	39.5046			35.4397	2.39512
32.0952	36.8093	32.8766	36.2785	36.6746	35.9831	36.0832	37.7136	31.9526	37.7677	37.3879	33.2333	37.2635	35.0318	39.8767			35.8018	2.31755
32.4754	36.8174	33.4208	36.1409	36.9948	36.5759	36.2927	37.665	31.9668	38.0046	37.396	34.143	38.0655	35.2088	40.0028			36.078	2.2432
33.3205	36.8395	34.0461	35.9751	37.0557	36.6051	36.3559	37.6161	31.9801	38.0027	37.4164	35.4284	39.2126	35.0991	40.2106			36.3443	2.16315
33.443	36.4005	34.7597	35.8856	36.8819	36.5544	36.354	37.4554	31.9578	38.0507	37.2525	35.8525	39.4136	35.2856	40.2855			36.3889	2.10399
34.06	36.0852	35.348	35.3997	36.6119	36.3954	36.2538	37.3845	31.9459	37.9714	36.8597	36.0203	39.552	35.1017	39.8895			36.3253	1.98378
34.4904	35.8825	35.5608	35.4152	35.998	36.0379	36.1539	37.2889	31.9324	37.8456	36.68	36.2724	39.4887	35.1599	39.6313			36.2559	1.89139
35.2394	35.4566	35.6441	35.2675	35.8584	35.8337	35.8864	37.0365	31.9319	37.6632	36.6904	36.0961	39.2381	35.0052	39.0717			36.1279	1.75537
35.8664	35.1889	35.6067	35.3745	35.7217	35.696	35.8292	36.9098	31.9705	37.245	36.4603	36.0427	38.9715	34.6909	38.8063			36.0254	1.66172
36.7518	35.1746	35.1729	35.5102	35.8293	35.7416	35.5232	36.653	31.9941	37.0234	36.4042	35.9786	38.1463	34.6904	38.3636			35.9305	1.5122
38.0145	34.7946	34.7577	35.8743	35.8879	36.0634	35.164	36.4827	31.9788	36.8288	36.191	35.819	38.0677	34.6557	37.7629			35.8895	1.55729
38.4437	34.4588	34.4862	35.8902	35.854	36.1693	35.2744	36.3004	31.9419	36.7092	36.1218	35.5079	37.596	34.7847	37.5834			35.8081	1.57035
38.994	34.289	34.1672	35.7113	35.8306	36.2761	35.1792	36.2058	31.9002	36.5216	36.0349	34.9511	37.6156	34.6939	37.5594			35.7286	1.6899
39.5008	33.5432	33.7677	35.7584	35.4284	36.1616	35.3193	36.0306	31.8764	36.4682	36.1069	34.8002	37.5189	34.9008	37.3594			35.6361	1.8166
40.0113	33.1452	33.4188	35.4658	35.533	35.9093	35.1698	35.683	31.8126	36.3691	36.0275	34.4297	37.5826	34.748	37.4054			35.5141	1.9793
40.4029	32.3277	33.2476	35.061	34.9694	35.4166	35.0061	35.5021	31.7817	36.319	35.4776	34.5186	37.5505	34.6312	37.3239			35.3024	2.12234
40.6024	31.9611	33.0455	34.744	34.6688	35.1987	34.8351	35.3243	31.7747	36.3451	35.2804	34.3332	37.4711	34.1377	37.1664			35.1259	2.21729
40.5091	31.6377	33.0312	34.3197	34.6516	34.8684	34.2358	35.078	31.786	36.298	34.8879	34.4155	37.5081	33.9541	37.1034			34.9523	2.24986
40.1912	30.9643	32.6834	34.0544	34.2017	34.3373	33.9586	34.6626	31.7541	36.4405	34.5031	34.3438	37.5732	33.7876	37.0923			34.7032	2.33312
39.6261	30.7908	32.5525	33.1924	34.0143	34.0981	33.652	34.4671	31.7329	36.4054	33.5507	34.4753	37.5065	33.3542	36.7321			34.41	2.29995
39.1115	30.6614	32.3144	32.9785	33.8355	33.8066	33.2957	34.288	31.6853	35.9261	33.287	34.3648	37.1404	33.4055	36.7037			34.187	2.21218
38.3724	30.401	32.336	32.773	33.4198	33.7356	32.9265	34.1407	31.5821	35.9148	33.0005	34.2239	36.957	33.3746	36.4942			33.9768	2.13532
37.5991	30.4447	32.2689	32.4406	33.2882	33.1451	32.5934	34.2317	31.5527	35.4411	32.8644	34.0895	36.8271	33.2945	36.1556			33.7491	1.99729
36.8874	30.7014	32.0413	32.2773	33.1489	32.8989	32.2763	34.1336	31.5251	35.192	32.789	33.9001	36.3921	33.2003	35.8315			33.5463	1.82441
35.3488	30.7605	31.9769	31.8799	32.9354	32.6823	31.7293	34.4049	31.4834	34.7069	32.5889	33.761	36.2082	32.8031	35.1315			33.2267	1.61671
34.658	30.8273	31.9114	31.8344	32.7452	32.325	31.4301	34.0582	31.4676	34.3493	32.643	33.6535	35.7114	32.3078	34.9063			32.9886	1.47126
34.1804	30.7576	32.0901	31.7926	32.7286	32.1316	31.1556	33.9962	31.4972	34.0688	32.6709	33.6273	35.4231	31.9607	34.6591			32.8493	1.39375
33.5863	30.8523	32.085	31.6954	32.7113	32.228	31.0135	33.7472	31.5071	34.0037	32.6696	33.436	35.2581	31.6628	34.3562			32.7208	1.30307
32.9849	30.9739	32.0742	31.4726	32.6029	32.229	30.7682	33.6612	31.511	33.9177	32.4074	33.3099	34.9984	31.5019	34.1015			32.5677	1.24267
32.5068	31.0648	32.005	31.3276	32.5265	32.1059	30.6561	33.6167	31.4718	33.9598	32.3635	33.0315	34.9549	31.3029	33.8863			32.452	1.23399
32.217	31.0176	32.0588	31.0487	32.5029	32.0636	30.4984	33.4284	31.409	33.9625	32.1514	32.6758	35.0119	31.3821	33.8801			32.3539	1.26102
31.4497	31.3906	32.0003	30.7821	32.2939	32.0848	30.5617	33.4911	31.4215	33.9891	32.0131	32.6106	35.0092	31.4394	33.9734			32.3007	1.28494
30.9135	31.4464	31.9028	30.5322	32.1605	31.9737	30.6408	33.3762	31.4683	34.1257	31.8502	32.3871	35.0932	31.3541	33.9115			32.2091	1.3463
30.6325	31.5537	31.6894	30.2485	31.8444	31.7449	30.6107	33.2422	31.4702	34.1104	31.5783	32.4075	35.2024	31.3524	33.6018			32.086	1.38883
30.1483	31.6627	31.711	30.2165	31.69	31.6621	30.6735	33.2589	31.4911	33.9803	31.489	32.3541	35.286	31.3928	33.5684			32.039	1.42761

## Sheet: Knee z
Angle																	Mena	SD
-3.67654	-1.69303	-0.439181	-1.67793	-8.21058	-5.02292	-4.50542	-0.015237	-3.41779	-0.501944	-0.253044	1.60621	-4.2989	-2.94335	3.13701			-2.12751	2.87851
-3.61409	-1.5465	-0.198966	-1.1165	-7.70532	-4.70521	-3.95447	-0.037405	-3.27626	0.042796	0.290315	1.90476	-3.48394	-2.67608	3.4245			-1.77683	2.82852
-3.44355	-1.06116	-0.112613	0.38022	-6.75734	-3.78677	-3.90867	0.475933	-2.98613	1.23261	0.076436	1.76608	-3.02708	-1.6014	3.63388			-1.27464	2.70938
-3.0394	-1.22287	0.038441	0.397579	-6.20441	-3.50074	-3.15213	0.439319	-2.20152	1.85672	0.129715	1.42906	-2.52476	-1.42876	3.20182			-1.05213	2.45222
-2.91612	-1.42353	0.06178	0.410763	-6.11261	-3.10635	-2.23752	0.708785	-2.02905	2.07026	-0.101607	1.38723	-1.44947	-1.35539	3.49254			-0.840018	2.37719
-2.81667	-1.40691	0.554248	0.568016	-5.65599	-2.97809	-1.89621	0.765965	-2.79486	1.98219	-0.154357	0.011514	-0.535701	-0.966007	3.57926			-0.782907	2.27071
-2.60605	-0.965196	0.551997	0.459794	-4.92731	-2.66829	-1.6395	1.13234	-2.86084	2.05693	-0.017531	0.090133	0.352181	-1.46834	3.34205			-0.611176	2.13604
-2.16973	-0.646172	1.49814	0.835164	-4.3691	-2.50431	-1.74701	1.07918	-1.23432	1.7245	0.182646	-0.603319	1.14981	-1.69694	3.42268			-0.338585	2.0131
-1.72259	0.194333	1.95716	1.36458	-3.71854	-2.26486	-1.26505	1.00186	-0.33328	1.64368	0.206765	-0.052905	1.45431	-1.89751	3.54404			0.00746647	1.91595
-1.57811	0.676345	2.38984	2.01962	-3.39243	-2.06253	-0.95572	1.09865	2.13749	2.18373	0.360549	-0.076059	1.71762	-1.276	3.74547			0.465898	1.99007
-1.68622	0.912944	2.33527	2.72886	-3.12404	-2.02209	-0.788835	1.55773	3.76866	2.53884	0.12096	0.367322	1.55556	-0.692291	3.68413			0.750453	2.10944
-1.94953	1.04858	2.385	3.4381	-2.6953	-2.05076	0.982262	2.00865	5.0446	2.64157	-0.393059	0.730235	1.75428	-0.469703	3.7162			1.07941	2.26186
-2.15612	1.45431	3.35023	3.92071	-2.35437	-2.06697	1.49154	2.46531	6.16341	3.35517	-0.687111	0.380434	2.1077	-0.367704	4.38417			1.42938	2.59795
-2.08112	2.09862	3.75897	4.27376	-2.08058	-2.02636	2.28063	4.16432	6.97942	3.12627	-0.466093	-0.189187	2.27129	-0.227092	4.01313			1.7264	2.77045
-1.76604	3.61938	4.20796	4.14648	-1.40072	-1.90148	3.3205	4.93577	8.60271	2.95174	0.719462	-0.822448	2.08104	0.030863	4.29649			2.20145	3.00111
-1.58048	3.81623	4.49788	4.5547	-0.742661	-1.34197	3.91951	5.60043	10.0578	2.9782	1.83933	0.465452	1.17652	0.174242	4.74581			2.6774	3.13
-1.45468	4.17733	4.80136	5.24915	-0.212182	-0.675075	4.69515	5.93285	10.7672	3.25536	3.59578	1.94734	0.954797	0.470123	5.52332			3.26852	3.19106
-1.3778	5.29516	5.59387	5.62657	0.524114	0.424958	4.84521	5.91099	11.2439	3.637	4.38412	3.02007	0.633063	1.00352	6.18475			3.79663	3.19816
-0.87057	5.67374	5.82582	6.03024	1.37461	0.703519	4.7108	6.29795	12.0606	4.24355	4.71046	4.07331	0.944327	1.9563	6.61214			4.28979	3.1864
-0.421838	6.12681	6.03539	6.77545	1.42888	0.916939	5.08349	6.4542	11.9408	5.49571	4.81013	5.04472	0.671572	3.79492	6.96856			4.74172	3.13912
-0.208365	6.76031	6.07794	7.21694	3.12522	1.42368	5.66455	7.01961	11.8316	6.21957	4.89546	5.51875	0.57879	4.25822	8.14166			5.23493	3.10191
0.406041	6.81469	6.63861	7.49775	3.99971	2.59172	6.00787	7.78997	11.8002	6.21038	4.92085	5.61607	-0.102713	4.38113	8.15145			5.51492	3.0401
1.05753	7.24432	7.01745	7.8946	4.80064	3.05212	6.16212	8.31892	10.486	6.58111	5.41489	5.60917	-0.52321	4.6172	8.362			5.73966	2.87995
1.66944	7.83707	7.42469	8.17318	6.0004	3.76123	6.90504	8.76789	9.98379	6.673	6.06276	5.61611	-0.805718	5.45435	9.06186			6.17234	2.85849
2.05642	8.32493	7.78532	8.79843	6.47613	4.31936	7.11664	9.11971	9.62281	7.44145	6.70955	5.84597	0.03327	5.68102	9.47533			6.58709	2.73009
2.14129	9.11725	7.9992	9.51311	6.8183	5.63197	8.41986	9.79736	9.59096	7.60902	7.67563	6.40005	0.868038	5.87117	10.1319			7.17234	2.7162
2.02402	9.07337	8.44652	9.754	7.94907	5.74515	8.71121	10.2463	8.46349	7.87693	8.34938	7.1217	3.76903	6.31984	10.3893			7.61595	2.33181
2.29379	9.15111	8.46143	10.0839	8.66068	5.87319	8.8305	10.7098	5.43739	8.89748	8.94974	7.86112	4.92315	7.38727	10.7164			7.88247	2.34128
2.72609	9.23593	8.56732	10.7154	8.88742	6.19383	9.18823	10.7608	3.15798	9.79698	9.18409	8.14803	5.53502	7.86456	11.2232			8.07899	2.59956
3.02824	9.49172	8.691	10.8568	9.60887	6.66612	9.49977	11.4155	0.334615	9.95102	9.62056	8.55149	5.47898	8.21032	11.5657			8.19804	3.13831
3.39327	9.61144	8.94959	10.977	9.70403	7.26788	9.68063	11.7737	-1.7543	10.3026	10.1994	8.79239	5.48636	8.6403	12.0559			8.33868	3.6002
3.66895	10.0201	9.3175	11.1925	10.0986	7.45249	9.78403	11.7622	-2.28126	11.382	10.7743	9.2164	5.43543	8.91371	12.1913			8.59522	3.80593
4.6751	9.8462	9.35518	11.5316	10.4936	7.62726	10.3885	12.464	-2.88226	11.7429	10.8031	9.38176	6.15104	9.39881	12.0658			8.86951	3.90537
5.26328	9.89703	9.45861	11.6789	10.6368	8.23194	10.9446	12.192	-4.34472	11.9626	11.1954	9.38407	7.00864	9.48692	12.5132			9.03395	4.20669
5.44511	10.3881	9.50297	12.3468	11.3253	8.72664	10.725	12.0284	-5.53448	11.9019	11.4813	9.70463	7.58093	9.99195	12.4616			9.20507	4.50651
5.78401	10.5719	9.47492	12.505	11.8891	8.91564	11.335	12.4815	-5.87766	12.6638	11.831	10.2497	8.849	10.3219	12.4818			9.56511	4.66521
6.19044	11.3527	9.3905	13.141	12.0952	9.19141	11.3914	12.5838	-5.23152	12.5664	11.969	10.7005	9.51116	10.4665	13.0313			9.88999	4.57206
6.39638	11.2247	9.65141	13.4383	12.044	9.93963	11.7922	12.3578	-5.27193	12.9998	12.0714	11.0774	9.95181	10.7566	13.0262			10.0971	4.60323
6.77284	11.3112	9.73909	13.4101	12.6455	10.107	11.9779	12.3349	-5.55793	12.6997	11.9367	11.2077	10.5497	10.8542	12.9832			10.1981	4.66058
7.46708	11.1164	9.79219	13.0866	13.0034	10.2317	11.4713	12.4675	-6.40383	12.6862	12.1869	11.5517	11.0696	11.0996	13.8389			10.311	4.88211
7.63074	11.1342	9.25754	13.0842	13.083	11.0107	11.6329	12.0684	-7.47434	12.5416	12.4259	12.1261	11.2464	11.1944	13.942			10.3269	5.1656
7.81899	11.1919	9.17951	13.3334	13.0105	11.1715	11.9202	11.7479	-7.72141	12.3988	12.0162	12.3722	11.3861	11.0861	13.8373			10.3166	5.21643
8.04123	10.4417	9.24407	13.4346	12.7312	11.4092	12.0218	11.8688	-8.02033	11.9682	12.2282	11.7602	11.9553	11.1011	13.6599			10.2563	5.26131
8.17339	10.7835	8.76249	13.2278	12.3492	11.0986	11.5541	11.4911	-8.30089	11.7356	12.2909	12.0556	11.9528	11.1088	13.657			10.1293	5.29716
8.6488	10.9313	8.77188	12.672	11.8652	11.5966	11.6366	11.3767	-8.05985	11.9675	12.0543	11.8391	12.1106	11.0819	13.6212			10.1409	5.19625
8.89481	11.0501	9.00476	13.0617	12.0116	11.5102	11.7542	11.394	-7.79718	11.5763	12.2221	12.0001	12.3653	10.8421	13.4453			10.2224	5.1383
9.24757	10.9299	9.1816	12.9778	11.6293	11.9884	11.0246	11.2444	-7.78071	11.9436	11.7148	12.3779	12.3326	10.6758	13.4249			10.1942	5.11135
9.09284	10.7929	9.12315	13.1382	10.6613	11.6503	11.378	11.0796	-7.55156	11.9745	11.6964	11.7976	12.5326	10.7929	13.4004			10.1039	5.03419
9.22251	10.8099	9.22055	12.9481	10.3848	11.4092	11.2948	10.4834	-7.23941	11.7879	11.4386	11.2431	12.7227	10.2785	13.2051			9.94732	4.90141
9.09907	10.5943	9.15757	13.1301	10.5057	11.5011	11.0597	10.2185	-7.05848	12.0405	11.7132	11.4822	12.913	10.051	13.2488			9.97709	4.8893
9.48079	10.7888	8.89149	12.657	10.9304	11.4515	10.4141	9.72853	-6.98913	12.0737	11.8509	11.3325	12.4989	10.1291	12.8247			9.87088	4.81456
9.86495	11.0761	9.18174	13.1435	10.5014	11.1466	10.7429	9.22415	-6.94721	12.0403	11.2249	11.7993	12.531	10.3295	12.3138			9.87819	4.79733
9.80153	10.3591	9.11327	12.8515	10.5316	11.4021	10.7491	7.68708	-7.06653	11.9463	11.1154	11.3413	12.4004	10.6481	11.1815			9.60412	4.78517
9.82974	10.2333	8.79646	12.4654	10.9633	11.29	10.6081	6.42763	-7.0605	11.3741	10.4904	11.1128	12.0115	10.5446	10.7023			9.31928	4.74828
9.72915	9.52027	9.0509	12.1005	10.2992	10.791	10.2217	5.57815	-6.93863	11.0532	9.90366	11.221	11.7904	10.6016	9.52671			8.96326	4.65318
10.1367	9.47766	9.04244	11.781	10.1448	10.7394	9.89589	4.80522	-6.8022	11.599	9.18855	11.0483	11.6771	10.2186	9.51655			8.83127	4.63818
9.93178	9.31455	8.88205	11.3755	9.53077	10.1082	9.01991	3.69637	-6.49709	10.7184	8.67975	10.7993	11.4628	9.65253	8.98327			8.37721	4.49912
10.1469	8.76917	8.4406	10.682	8.90735	9.88231	8.40831	3.05923	-6.23498	10.2114	7.95703	10.3199	11.0623	9.04499	7.83776			7.89962	4.34894
9.9141	8.27317	8.46037	10.2721	8.34032	9.67167	8.18376	2.57368	-6.10349	9.70645	7.18903	9.80683	11.0245	8.41303	7.85697			7.57217	4.25808
10.1774	7.22027	8.31897	9.54616	7.85886	9.00444	7.62762	2.04672	-6.01731	9.02296	6.96608	8.22228	10.8384	7.87165	7.39914			7.07357	4.12882
10.1951	6.31965	6.6487	9.1886	7.15985	8.0972	6.75336	1.86623	-5.9887	8.07014	6.3947	7.71195	10.2585	5.68349	6.86283			6.34811	3.96368
10.1138	5.28067	5.70068	8.62544	6.77343	7.22241	5.24684	1.86182	-5.90863	7.29958	6.0764	7.06139	9.68096	4.92094	5.23306			5.67926	3.80417
10.4309	4.60047	4.36224	7.83332	4.87097	6.55443	4.43238	1.83725	-5.74126	6.69589	5.38922	6.34232	9.55925	4.04323	4.93643			5.07647	3.70973
10.4328	4.52789	3.79004	7.283	4.24234	5.47147	3.74828	1.64024	-5.75864	5.429	4.71497	5.33884	8.60992	3.19371	3.89746			4.43742	3.57527
10.0568	4.58738	2.16646	6.28744	3.97954	5.10825	3.37995	1.7878	-5.64001	4.74018	4.15749	4.84891	7.69527	2.2481	3.4356			3.92261	3.41537
9.97674	4.44112	1.25742	5.75432	3.11143	4.67503	3.00431	1.7354	-5.4896	3.08441	3.70883	4.19524	6.40568	1.93302	2.19055			3.33226	3.29003
9.86243	4.27827	0.445923	5.14147	2.97639	4.19153	2.60745	1.63349	-5.47796	2.5965	3.36855	3.28649	6.13295	1.7116	1.633			2.9592	3.26073
9.42403	3.63856	0.26744	4.38779	2.70847	3.48997	2.10534	1.31273	-5.37001	2.19632	3.51783	2.54868	5.64921	1.69401	2.13441			2.64698	3.09169
8.15755	3.09564	0.119283	4.23941	2.24701	3.29185	1.4073	1.23741	-5.50839	1.85843	3.81125	1.6022	4.99042	2.06156	2.41028			2.33475	2.89827
7.54912	3.25722	-0.815224	4.14208	2.10988	2.86311	1.0632	0.751967	-5.38628	1.84804	3.97571	0.647999	5.01907	2.53654	2.0699			2.10882	2.89853
6.43135	2.65419	-0.731968	3.73447	1.73743	2.65419	0.766071	1.02544	-5.41972	1.67728	3.33916	0.042735	4.03089	2.6111	1.08265			1.70902	2.65055
5.4032	2.2635	-1.29729	3.83964	1.52675	2.1019	0.600527	0.825465	-5.58863	1.79293	3.12467	-0.280556	3.17672	2.12188	0.681464			1.35281	2.54153
4.44547	2.02585	-1.34272	4.14674	1.54248	1.89777	0.490392	0.840627	-5.56664	1.15501	2.31039	-0.560341	3.09249	2.18883	0.442073			1.14056	2.43197
3.32662	1.75867	-1.21101	3.88916	1.26488	1.2912	0.686342	0.436842	-5.53843	0.771981	1.37514	-0.987777	2.77938	2.08436	0.588343			0.83438	2.24865
2.18716	1.5655	-1.1437	3.16583	0.315038	1.33228	0.465023	0.34684	-5.5919	0.45971	0.883034	-1.47561	2.56162	1.38545	0.714964			0.478082	2.08357
-0.40147	0.947056	-1.39641	1.97575	-0.025183	0.018477	0.279913	-0.061714	-5.52937	0.58986	0.0314	-1.59452	2.67459	0.679368	-0.00481			-0.121139	1.84884
-0.854867	0.765252	-1.43163	1.55378	-0.899406	-0.627636	-0.007558	-0.037161	-5.37944	0.489398	-0.018837	-1.7254	1.57027	0.27393	0.178395			-0.410061	1.67311
-1.33092	0.618713	-1.27062	1.24667	-1.5243	-0.696517	-0.589907	-0.369571	-5.35904	0.306793	0.151745	-1.92499	1.6887	-0.688268	0.30444			-0.629138	1.6613
-1.7951	-0.863309	-1.39244	0.63348	-2.086	-1.15691	-0.748978	-0.551404	-5.2836	-0.42075	-0.185528	-1.4691	1.82525	-1.29117	-0.353458			-1.00927	1.53514
-2.45447	-1.27381	-1.10948	0.647018	-2.14556	-2.29058	-1.2192	-0.982515	-5.14745	-0.657287	0.124719	-1.55693	0.133553	-1.70362	-0.581579			-1.34781	1.38811
-3.06502	-1.82957	-1.05517	-0.141773	-2.8067	-2.01946	-1.38996	-0.870174	-5.15266	-1.01767	-0.406081	-1.70154	0.384684	-1.64626	-1.12085			-1.58921	1.34686
-3.23182	-2.56307	-1.44379	-0.314485	-2.67573	-2.47205	-1.48968	-1.36522	-5.25418	-0.978621	-0.260352	-1.67111	0.089427	-2.41681	-1.65758			-1.847	1.34697
-3.39343	-2.65978	-1.40648	-0.698762	-2.64721	-2.55772	-1.64887	-1.38896	-5.46442	-0.794738	-0.565733	-1.96983	-0.901416	-2.40958	-1.79148			-2.01989	1.26982
-2.99236	-3.26423	-2.13778	-1.05694	-3.06965	-2.74012	-1.76082	-1.9075	-5.70801	-1.10103	-0.957253	-2.11951	-1.26547	-2.95892	-2.5991			-2.37591	1.21322
-2.78309	-3.09926	-2.37948	-1.60909	-3.2819	-3.0554	-1.99003	-1.90865	-5.75405	-1.46434	-1.05139	-2.56593	-1.18172	-2.7516	-2.64699			-2.50153	1.1453
-2.72609	-3.56432	-2.77853	-1.6647	-3.20807	-3.58704	-2.54139	-1.89984	-5.76516	-1.09462	-1.60016	-2.76326	-1.06732	-3.70621	-2.87115			-2.72252	1.20777
-2.59032	-3.89068	-3.19687	-2.50562	-3.63657	-3.82744	-3.01031	-2.34089	-5.73226	-1.14975	-1.80152	-3.0611	-1.06011	-3.69265	-3.42927			-2.99502	1.18093
-2.7337	-3.95087	-3.7839	-2.65286	-3.8995	-4.06593	-3.29219	-2.69202	-5.62454	-1.21925	-1.50621	-3.26671	-0.810954	-4.13357	-3.25724			-3.12596	1.25648
-2.17218	-3.72109	-4.14228	-3.22911	-3.8527	-4.46415	-3.5439	-2.73563	-5.61926	-1.29668	-1.80265	-2.99571	-0.949428	-4.24245	-2.94584			-3.18087	1.26082
-2.06234	-3.53451	-4.94372	-3.62579	-4.32806	-4.2556	-4.15613	-3.03998	-5.55482	-1.08456	-1.74992	-3.09471	-1.03012	-3.98449	-2.78074			-3.2817	1.34929
-1.87477	-3.23396	-5.53989	-3.76137	-4.42657	-4.6472	-4.53383	-2.63721	-5.50277	-1.01119	-1.73484	-2.87123	-0.584749	-3.82068	-2.51036			-3.24604	1.54132
-1.51032	-2.65719	-5.6213	-3.94116	-4.72572	-4.76886	-4.75982	-3.10872	-5.47633	-1.26704	-2.03979	-3.13848	-0.353198	-3.95436	-2.84979			-3.34481	1.59332
-1.59359	-2.12841	-6.12205	-4.15036	-5.07098	-4.4658	-4.70773	-2.76321	-5.54443	-1.16394	-2.28722	-2.83692	-0.5287	-3.60513	-2.73308			-3.31344	1.66195
-2.17693	-1.13013	-6.50852	-4.62108	-4.50062	-4.8493	-5.02192	-3.06167	-5.63669	-1.59759	-2.30477	-3.05886	0.00144	-3.5381	-2.77671			-3.38543	1.80081
-2.77628	-0.947475	-6.95235	-4.25617	-4.84401	-5.54548	-4.8591	-2.9637	-5.60965	-1.31794	-2.13327	-3.32972	0.01749	-3.70718	-2.63284			-3.45718	1.92547
-2.98517	-0.609224	-6.60367	-4.33906	-4.87764	-5.00986	-4.6299	-2.95692	-5.76898	-1.44252	-2.42955	-3.7512	0.00979	-3.62807	-2.98618			-3.46721	1.84934
-4.66125	-0.058437	-6.52115	-4.30274	-4.97921	-5.09957	-4.88626	-3.24734	-5.74154	-1.52127	-2.2976	-3.44055	0.031008	-3.55554	-2.98043			-3.55079	1.9418
-5.86283	0.243432	-6.11944	-4.41099	-4.96478	-4.89289	-4.82339	-3.31395	-5.70557	-1.39309	-2.29451	-3.16486	-0.030908	-3.56671	-2.7514			-3.53679	2.01082
-6.81022	0.496875	-5.44167	-4.41455	-5.60932	-5.08278	-4.59825	-3.30988	-5.75266	-1.45529	-2.32836	-3.14874	-0.06997	-3.38082	-2.49001			-3.55971	2.12524
-7.76211	1.0538	-5.18442	-4.38541	-5.32057	-5.15295	-4.28319	-3.69285	-5.69156	-1.28316	-2.52239	-2.82704	-0.120722	-3.68501	-2.61241			-3.56467	2.27605

## Sheet: Ankle x
Angle																	Mena	SD
11.0335	17.7003	12.9408	12.4685	12.3592	11.6281	9.49864	14.956	12.2927	16.1167	13.868	12.7883	13.78	13.1168	17.0308			13.4385	2.23
11.0062	16.9519	12.743	12.0255	12.6081	11.7678	9.14607	14.3561	12.3926	16.1503	13.5677	12.4529	14.2979	12.8708	16.6053			13.2628	2.13056
10.9163	16.6525	12.2684	11.418	13.1765	12.0854	8.699	13.1623	12.0583	16.1017	12.5583	11.962	14.5607	12.1888	15.5666			12.8917	2.09418
10.8136	16.1575	12.092	11.0246	13.3146	12.1731	8.35859	12.5278	11.605	16.0142	12.0128	11.3435	14.9479	11.7513	14.6755			12.5875	2.11091
10.4749	15.1138	11.8984	10.7633	13.2884	12.2356	7.6535	11.964	10.2969	15.7753	11.3806	10.7248	15.6849	11.2493	14.0267			12.1687	2.25445
10.2665	14.6638	11.8124	10.4364	13.105	12.252	7.26701	11.3558	8.51845	15.1496	10.7634	9.11352	16.1383	10.7821	13.372			11.6664	2.49865
10.0663	14.37	11.5872	10.2297	13.088	12.067	6.94041	10.3665	7.62382	14.1277	10.0903	8.46806	16.567	9.531	12.6062			11.1819	2.66189
9.87013	13.6711	11.4186	9.93796	12.9713	11.9474	6.45693	9.93167	6.70739	13.5616	8.88926	7.71746	16.9124	8.87721	11.1691			10.6693	2.85792
9.62996	13.5999	11.3399	9.82842	12.5305	11.8113	6.34628	9.4261	6.28901	13.0779	8.32602	7.24175	16.9329	8.30348	10.6474			10.3554	2.94482
9.37094	13.1358	11.3032	9.7525	12.2209	11.5896	6.16869	9.18559	6.47843	12.6594	7.72941	6.66751	16.7317	7.77852	9.89133			10.0442	2.93693
9.01693	12.9654	11.1706	9.81491	11.9332	11.0548	6.09728	8.76414	6.7881	11.5486	7.33906	6.19075	16.1465	6.88069	9.22645			9.66249	2.84702
8.29792	12.7775	11.0668	9.78568	11.2267	10.9235	6.38996	8.61861	7.18452	11.0107	6.27104	5.81043	15.8619	6.35592	7.88274			9.29759	2.85635
7.92736	12.5474	11.0673	9.88366	10.8827	10.8052	6.57143	8.61923	7.4235	10.6775	5.99691	5.32936	15.5283	5.98495	7.59457			9.12263	2.8396
7.62672	12.478	11.155	9.99721	10.5632	10.3417	6.75749	9.04253	7.58359	10.1956	5.85622	4.79325	14.4452	5.78097	7.00739			8.90827	2.7225
7.42966	12.6085	11.3139	10.2753	10.1129	10.2875	7.03741	9.24544	7.88237	9.72253	6.10218	4.27696	13.7907	5.5717	6.6093			8.81775	2.69487
7.13179	12.6525	11.4987	10.7554	10.0291	10.1629	7.29611	9.4758	8.26489	9.1436	6.24015	4.4824	12.071	5.01394	6.14738			8.69105	2.56778
6.99478	12.7807	11.7722	11.5673	9.93948	10.0061	7.619	9.66027	8.7766	9.04846	6.66295	4.87375	11.2039	4.90394	5.64164			8.76341	2.5557
6.85343	13.2339	12.2429	11.9245	9.76833	9.88131	7.84702	9.94363	9.32285	8.86503	6.94103	5.20954	10.5328	4.90427	5.58393			8.87029	2.59753
6.86059	13.3868	12.4856	12.104	9.82781	9.91974	8.37793	10.0767	10.7326	8.78633	7.1289	5.41442	9.16649	5.1689	5.58464			9.00143	2.5975
7.03479	13.566	12.7152	12.3194	9.90137	9.91913	8.70307	10.1969	11.9476	9.0563	7.24522	5.54455	8.47253	5.73658	5.62008			9.19858	2.64819
7.19296	13.9494	12.8553	12.6169	10.1556	10.0648	9.02192	10.3821	13.4746	9.29125	7.29489	5.64914	7.79856	5.87718	5.97263			9.43981	2.82575
7.45019	14.1245	13.2914	12.7461	10.3133	10.3587	9.41517	10.649	14.6072	9.46123	7.34577	5.67514	6.37571	5.99691	6.16163			9.59814	3.06612
7.77862	14.4765	13.4502	12.9007	10.5328	10.4831	9.64272	10.6689	15.9943	9.67392	7.44897	5.65514	5.87508	6.09269	6.44005			9.80758	3.29726
8.13395	14.5984	13.6728	13.0455	10.8091	10.6292	9.95298	10.6736	16.8482	9.88338	7.57275	5.59412	5.382	6.28059	6.76985			9.98977	3.45074
8.4767	14.7926	13.9699	13.2234	10.9787	10.8667	10.2079	10.6752	16.9176	9.97737	7.70049	5.61277	5.30516	6.39652	6.98472			10.139	3.48329
9.04805	14.9683	14.1974	13.5295	11.2135	11.2147	10.5934	10.704	17.6088	9.95333	7.95009	5.7037	5.34759	6.47621	7.27407			10.3855	3.57853
9.26265	15.0308	14.6137	13.6751	11.7167	11.368	10.7465	10.8079	18.5861	9.97847	8.1489	5.81294	6.06209	6.60144	7.55602			10.6645	3.66216
9.51459	15.1643	14.8264	13.8635	11.9022	11.5101	10.889	10.9189	19.8264	10.1496	8.36442	5.93963	6.37142	6.94877	7.92195			10.9407	3.79777
9.70041	15.488	14.9938	14.0237	12.0741	11.664	11.0478	11.0548	20.3507	10.3733	8.56075	6.06095	6.56027	7.1802	8.29332			11.1617	3.85388
10.0653	15.6574	15.1157	14.1619	12.425	11.9482	11.2406	11.4856	20.2186	10.4622	8.80858	6.21368	6.68459	7.40234	8.60452			11.3663	3.78908
10.3413	15.9658	15.2286	14.4847	12.4801	12.1689	11.4144	11.7848	20.0443	10.5662	9.42916	6.38457	6.67275	7.6871	9.18401			11.5891	3.71301
10.5961	16.1229	15.3736	14.6331	12.6119	12.3811	11.5812	12.1376	20.0235	10.9135	9.85427	6.52592	6.61773	8.08956	9.45417			11.7944	3.66677
10.999	16.2455	15.5296	14.8793	12.9042	12.6053	11.9956	12.6315	20.0476	10.9676	10.2277	6.86361	6.71768	8.28803	9.63872			12.0361	3.62479
11.181	16.7248	15.588	15.1192	13.0811	13.1245	12.268	13.5237	19.5947	11.0798	10.6588	7.07701	6.89506	8.39949	10.0064			12.2881	3.55305
11.3744	17.0188	15.7126	15.8269	13.3748	13.3872	12.4354	14.036	18.9378	11.3122	11.6117	7.34427	7.00303	8.69467	10.6396			12.5806	3.43593
11.5638	17.3181	15.7823	16.1753	13.836	13.6765	12.8574	14.6514	18.5197	11.9067	12.0665	7.72081	7.28661	9.34812	10.9675			12.9118	3.30403
11.7253	18.0116	15.9955	16.5201	14.083	13.9971	13.2335	15.1188	17.6955	12.2231	12.661	8.04557	7.46029	9.76848	11.4743			13.2009	3.21806
11.8738	18.3101	16.1502	16.8636	14.3929	14.6614	13.6723	15.9789	16.7657	12.6895	13.2474	8.50239	7.62689	10.1973	11.9473			13.5253	3.12369
12.0802	18.9495	16.377	17.2844	15.2015	14.9945	14.1149	16.4461	16.0966	13.1027	13.8393	9.02453	7.99927	10.6866	12.426			13.9082	3.0749
12.5981	19.2737	16.579	18.0557	15.6195	15.4437	14.9452	16.9597	15.2832	13.5577	15.0272	9.5697	8.29575	11.1861	13.5077			14.3935	3.02535
12.858	19.7083	17.0075	18.3732	16.009	16.4602	15.462	17.8321	14.5066	14.6705	15.6693	10.2431	8.81245	12.2214	13.9929			14.9218	2.97497
13.1365	20.6109	17.257	18.6274	16.7818	16.8944	16.0515	18.2843	13.9437	15.2622	16.2793	11.6404	9.04844	12.6887	14.4754			15.3988	2.98357
13.48	21.0143	17.4838	18.9191	17.1159	17.4293	16.5116	18.7125	13.5954	15.8265	16.8481	12.198	9.49531	13.2453	14.8518			15.7818	2.98346
13.7729	21.8373	17.6976	19.0579	17.4791	17.9338	16.8741	18.9079	13.3548	16.4145	17.8639	12.9251	10.3346	13.7359	15.7123			16.2601	2.9617
14.0986	22.251	18.0253	19.0572	18.1471	19.0385	17.4203	19.4311	13.2446	17.6333	18.3039	13.5768	10.8648	14.7756	16.0408			16.7939	2.97161
14.5387	22.6071	18.6736	19.0939	18.4617	19.4994	17.8312	19.7819	13.0419	18.0148	18.491	14.3051	11.4432	15.203	16.3461			17.1555	2.95018
15.4164	22.9257	19.0545	19.0885	18.7488	19.9888	18.2431	19.9571	12.9005	18.5379	18.6316	15.0725	12.5247	15.619	16.5555			17.551	2.82355
15.7533	22.9312	19.2666	19.0013	18.7839	20.1768	18.4743	20.2288	12.7711	19.0312	18.5774	15.5859	13.1241	15.9262	16.629			17.7507	2.753
16.2094	22.8444	19.5391	19.0393	18.8159	20.4003	18.5233	20.9879	12.8137	19.5989	18.7282	16.056	13.794	16.5881	16.9792			18.0612	2.67508
16.6481	22.3183	19.7641	18.9446	18.6968	20.551	18.6173	21.3972	12.8155	20.0498	18.9074	16.5853	14.9275	16.6127	16.9768			18.2542	2.51769
17.1515	22.2289	19.933	18.8386	18.8298	20.4917	18.5015	22.0047	12.7918	20.1721	19.0652	17.191	15.2969	16.6915	17.009			18.4132	2.49717
17.6265	22.0394	19.8814	19.0083	18.6717	20.3219	18.6635	22.7065	12.7288	20.3275	19.1346	17.5753	16.2522	16.6855	17.0042			18.5752	2.46299
18.0177	21.7725	19.7434	18.8712	18.6059	20.185	18.7728	24.0888	12.6685	20.1874	19.9189	17.6652	16.593	16.7267	17.0086			18.7217	2.59969
18.446	21.7645	19.5073	18.89	18.6562	19.9521	18.8868	24.5333	12.6231	19.9326	20.2058	17.7074	16.7759	16.6146	17.0622			18.7705	2.64757
19.239	21.9415	19.5027	19.089	18.5511	19.8494	19.4597	24.8993	12.581	19.9231	20.685	17.9433	17.224	16.8643	16.8928			18.9764	2.71326
19.7474	22.2727	19.2672	19.4254	18.8379	20.0998	19.9762	25.0526	12.6337	20.06	21.271	18.0361	17.2505	17.0417	16.9914			19.1976	2.78297
20.0946	22.5148	19.272	19.6914	19.6199	20.778	20.4257	25.3721	12.6877	20.5293	21.7091	18.379	17.1793	17.8528	17.0865			19.5462	2.85373
20.3322	23.0214	19.2361	20.6025	20.1857	21.1471	21.0892	25.5174	12.6858	20.9282	22.8631	18.6487	16.9375	18.3537	17.4518			19.9334	3.00074
20.5935	23.0615	19.2897	21.106	20.7875	21.6625	21.8344	25.4878	12.6626	21.5117	23.0715	18.9707	17.0322	18.9567	17.8372			20.2577	3.02975
21.0223	23.0164	19.4563	21.4393	22.1696	22.1273	22.4031	25.5704	12.7552	22.0701	23.4329	20.055	17.0657	19.5554	18.0946			20.6822	3.07715
21.2573	22.7655	20.0153	21.7841	22.6177	23.024	22.7879	26.0629	12.8252	23.3303	23.6176	20.7489	17.5974	20.2273	18.5983			21.1506	3.12919
21.6398	22.3024	20.3856	22.0276	22.9617	23.1859	23.3912	26.1194	12.8754	23.7298	23.8479	21.5273	17.8901	20.5706	19.5153			21.4647	3.10256
21.8882	21.9727	20.6909	21.8335	23.0304	23.3758	23.5566	26.1943	12.8949	24.0464	23.7885	22.2728	18.5798	20.6842	20.0979			21.6605	3.052
21.9396	21.9841	21.2686	21.6956	23.0489	23.4533	23.7868	25.9833	12.9369	24.249	23.5739	22.7325	19.5333	20.6545	20.5727			21.8275	2.95926
21.9205	21.572	22.4892	21.4599	23.2523	23.6255	24.0307	25.8856	12.9822	24.4407	23.4037	23.2232	19.9089	20.4813	21.251			21.9951	2.95366
21.9983	21.404	22.7625	21.3248	23.3482	23.6927	24.2895	25.7734	13.068	24.5511	23.3902	23.442	20.7488	20.1891	21.4519			22.0956	2.93823
22.1049	21.1184	22.858	21.3925	23.4862	23.6952	24.5084	25.5939	13.0583	24.6657	22.9989	23.5805	20.9877	19.9894	22.068			22.1404	2.94613
22.2124	20.6676	23.0234	21.3019	23.6581	23.8103	24.6663	25.3766	13.0759	24.6276	22.8755	23.6455	21.0045	19.8514	22.5639			22.1574	2.96964
22.9828	20.5168	23.2059	21.4023	23.7354	23.8923	24.9301	25.4419	13.0416	24.5745	23.0063	23.7269	21.2955	19.8024	22.9659			22.3014	3.02105
23.3418	20.6075	23.1308	21.7306	23.8462	23.9356	24.9029	25.2071	13.099	24.4493	23.0855	23.5603	21.2941	20.1078	23.1713			22.3646	2.96712
23.7162	20.1944	23.2511	21.9508	23.7083	24.0328	24.9033	25.1755	13.0625	24.3876	23.1372	23.7041	21.1288	20.1631	23.2332			22.3833	3.00672
24.0984	20.0711	23.1566	22.1692	23.4493	24.2376	24.8136	24.8487	13.0266	24.49	23.1661	23.8196	21.2062	19.9999	23.3094			22.3908	3.0246
24.7537	19.891	23.1571	22.3233	23.3081	24.2607	24.6019	24.5947	13.0245	24.3552	23.0562	23.8611	21.464	19.9811	23.4251			22.4039	3.02881
25.2035	19.7586	23.3253	22.5745	23.291	24.2363	24.5799	24.1523	13.0421	24.144	22.8402	23.8888	21.6172	19.9164	23.7163			22.4191	3.03836
25.4958	19.3126	23.609	22.4563	23.0291	24.4011	24.2681	23.7834	13.0228	24.1753	22.5799	23.7266	21.6332	19.8708	23.9223			22.3524	3.07675
25.5273	18.7194	23.4314	22.2891	22.8382	24.2264	23.755	22.9885	13.0112	24.2076	21.913	23.7475	21.8915	19.7361	23.9418			22.1483	3.07483
25.5949	18.3396	23.3666	22.2556	22.5389	24.1407	23.5103	22.7506	13.016	24.2938	21.6124	23.6886	21.6949	19.7257	24.2184			22.0498	3.10643
25.6669	17.8245	23.4285	22.0804	22.1214	24.1609	22.9543	22.4128	13.0046	24.3372	21.3626	23.4559	21.8789	19.7311	24.3671			21.9191	3.14264
25.7251	16.8847	23.2938	22.0114	21.6896	24.1515	22.7936	22.0644	12.973	23.9398	20.9956	23.4759	21.9192	19.8504	24.1238			21.7261	3.20185
25.6603	16.4703	23.3221	21.7799	21.6225	24.0521	22.3838	21.2478	13.001	23.6455	20.8492	23.2914	21.5786	19.7644	24.0032			21.5115	3.19742
25.579	15.8349	23.0347	21.4418	20.8924	24.0022	21.9901	20.971	12.973	23.3062	20.4669	23.0645	21.6849	19.7122	23.6661			21.2413	3.21433
25.5809	15.4793	22.799	21.268	20.744	23.8808	21.556	20.5947	12.9395	22.5221	20.3638	22.7728	21.5397	19.4543	23.2336			20.9819	3.18602
25.6272	15.38	22.6799	21.1605	20.5226	23.8021	20.7039	20.2529	12.8874	22.0863	20.211	22.3027	21.149	19.2727	22.8664			20.727	3.15383
25.6581	14.9533	21.7085	21.018	19.9752	23.5753	20.1612	19.4387	12.8203	21.7709	20.1451	21.8967	20.9507	18.9885	22.3071			20.3578	3.14182
25.5689	14.8377	21.2154	20.692	19.6206	23.4468	19.6207	19.0883	12.7714	21.3092	19.8482	21.4607	20.8575	18.8483	21.5351			20.0481	3.08365
25.3994	14.6255	20.5874	20.7309	19.4201	23.3357	18.9555	18.8537	12.746	20.9308	19.5514	21.0604	20.5028	18.3644	21.0948			19.7439	3.05594
25.3691	14.2724	20.0397	20.3204	19.0718	23.313	18.3484	18.5901	12.7018	20.7945	19.3466	20.2666	20.2472	18.2809	20.6186			19.4387	3.06312
24.9005	14.2893	19.4096	20.2362	18.8123	23.111	17.7561	18.172	12.6872	20.4931	19.2273	19.8429	20.1574	18.0344	20.2757			19.1603	2.97881
24.7639	14.3998	18.2288	20.0591	18.6924	22.9312	17.2428	18.0102	12.6463	20.2571	19.1021	19.5432	19.811	17.9201	20.0241			18.9088	2.93648
23.6868	14.4654	17.4736	19.508	18.2798	22.8082	16.1994	17.8957	12.6239	20.0307	18.8098	19.1874	19.6494	17.9916	19.397			18.5338	2.79444
23.1122	14.4085	16.827	19.2648	18.138	22.3198	15.6345	17.6925	12.6103	19.8194	18.6822	18.9439	19.4858	17.7155	19.1983			18.2568	2.71017
22.3984	14.5564	16.314	19.0632	17.9868	22.1332	15.1155	17.485	12.5785	19.5175	18.544	18.6081	19.37	17.5022	18.8604			18.0022	2.61959
21.5473	14.6039	15.6793	18.9178	17.6242	22.0843	14.65	17.461	12.539	19.3429	18.2771	18.4757	19.1715	17.4128	18.642			17.7619	2.56192
20.3621	14.8644	14.7481	18.4596	17.5855	21.847	14.1867	17.185	12.4912	19.0256	17.8578	18.3153	19.0361	17.3359	18.3587			17.4439	2.46255
19.2626	14.9478	14.2798	18.3807	17.3803	21.5396	13.9838	16.9726	12.4692	18.831	17.7489	18.137	18.87	17.1493	18.3357			17.2192	2.37251
18.3132	15.081	14.0638	18.2013	17.1474	21.5978	13.6934	16.8214	12.4416	18.6386	17.5593	17.7329	18.7138	17.1864	18.2012			17.0262	2.33479
16.0762	15.5683	13.8952	18.027	16.9644	21.5237	13.1804	16.6243	12.4433	18.5	17.4785	17.6934	18.4057	17.1956	18.1718			16.7832	2.31764
14.7407	15.7932	13.8217	17.7545	16.8641	21.4418	13.1036	16.5517	12.4603	18.3785	17.2677	17.6103	18.315	17.1461	18.1714			16.628	2.3355
13.6738	16.0941	13.7641	17.4731	16.6809	20.9949	13.022	16.5353	12.4498	18.1863	16.9826	17.4691	18.2381	17.0713	17.9694			16.4403	2.31133
12.6911	16.4472	13.7647	17.3659	16.6947	20.8834	12.9688	16.3953	12.4779	18.0593	16.735	17.4493	18.1959	16.9201	17.8649			16.3276	2.36808

## Sheet: Ankle y
Angle																	Mena	SD
5.68728	9.01702	6.03378	7.46822	9.84856	6.97393	6.47237	5.89364	8.0216	8.42553	7.57206	6.89815	7.9789	9.08905	9.34468			7.64832	1.32262
5.56824	8.52521	5.88239	7.26196	9.87071	6.66133	6.32201	5.57742	7.90877	8.39484	7.39202	6.80199	8.03839	8.95477	9.2235			7.49224	1.35505
5.48773	8.47921	5.44345	7.08211	9.78769	6.27991	6.06769	5.09323	7.33359	8.28976	6.81894	6.61563	8.07341	8.68118	8.84564			7.22528	1.42123
5.40795	8.10513	5.27905	6.89821	9.78408	6.10386	6.0536	4.89183	7.00349	8.29757	6.57241	6.40895	8.13274	8.43572	8.525			7.05997	1.42564
5.08058	7.40722	4.97032	6.73275	9.66583	5.88707	5.92997	4.82669	6.15434	8.11193	6.17573	6.18813	8.18988	8.21879	8.30531			6.78964	1.45125
4.86864	7.04069	4.85867	6.59721	9.25019	5.6592	5.84664	4.72848	4.94659	7.76712	5.86848	5.42717	8.37923	8.18227	8.07842			6.49993	1.50983
4.75588	6.84381	4.61439	6.46414	9.23556	5.20348	5.77324	4.75241	4.38703	7.12249	5.73241	5.27303	8.59398	7.46328	7.73438			6.2633	1.52142
4.62736	6.27065	4.32523	6.02682	9.01358	5.03256	5.6196	4.69322	3.93647	7.07016	5.43232	4.89468	8.66416	7.09733	7.42793			6.0088	1.55655
4.48862	6.23894	4.16737	5.7703	8.43735	4.83504	5.5353	4.60293	2.83771	6.83101	5.47687	4.91664	8.67738	6.81886	7.24534			5.79198	1.60572
4.29404	5.90262	3.96603	5.48735	8.22481	4.64612	5.379	4.5984	2.01032	6.78997	5.42502	4.99401	8.72852	6.72156	7.18526			5.62354	1.72339
4.07603	5.63235	3.64532	5.22885	7.89554	4.20996	5.1014	4.19794	1.64616	6.62743	5.31015	5.14135	8.4728	6.35044	6.98004			5.36772	1.74422
3.5584	5.3398	3.39678	4.54659	7.24771	3.99474	4.619	3.8654	1.3365	6.58179	4.71171	5.2194	8.46331	6.12727	6.77545			5.05226	1.79077
3.28707	4.67567	2.98997	4.25307	6.87604	3.66686	4.2592	3.49108	1.14677	6.69884	4.23642	5.01845	8.37733	5.92637	6.9074			4.78737	1.87657
3.10366	4.46091	2.76027	3.96986	6.63399	3.19608	3.93235	3.05219	0.961724	6.48697	3.70359	4.61878	7.97328	5.71253	6.61702			4.47888	1.8719
2.99299	4.10247	2.58269	3.68373	6.04385	2.91782	3.70304	2.89827	0.678154	6.40603	3.29681	3.63052	7.7239	5.50335	6.48405			4.17651	1.87215
2.83908	3.83831	2.35952	3.42505	5.93737	2.80072	3.40579	2.68163	0.494233	6.01545	2.97326	3.34659	6.99171	4.79871	6.28136			3.87925	1.77455
2.70834	3.55076	2.17679	3.06655	5.76345	2.59462	3.26606	2.50815	0.620662	5.7396	2.43994	3.09292	6.69877	4.35043	5.81834			3.62636	1.69528
2.5586	3.12637	1.98981	2.91454	5.3533	2.19639	3.02784	2.133	0.853412	5.34314	2.28275	2.8554	6.46423	3.95164	5.62123			3.37811	1.61336
2.06298	2.85058	1.91787	2.7507	5.14327	1.88107	2.62245	2.06631	1.43718	5.06978	2.03615	2.67416	6.60445	3.60497	5.30912			3.20207	1.57735
1.89766	2.69896	1.84217	2.70113	4.64063	1.58189	2.56271	1.95686	1.85263	4.31355	1.88216	2.53831	6.78012	3.08755	5.10016			3.0291	1.5099
1.70071	2.43785	1.75409	2.39582	4.12639	1.33111	2.54836	1.91964	2.37174	3.98223	1.64795	2.37819	6.9631	2.83129	4.91826			2.88711	1.51525
1.58774	2.31332	1.58566	2.23514	3.88859	1.02429	2.48508	1.6783	2.71493	3.6074	1.61193	2.24646	6.74606	2.53996	4.76204			2.73513	1.48801
1.47632	2.07761	1.5363	2.09403	3.65056	0.856293	2.36357	1.56924	2.95776	3.35812	1.59551	2.13711	6.49213	2.36479	4.73185			2.61741	1.46033
1.41214	1.98383	1.43572	1.91956	3.25561	0.818928	2.33221	1.45161	3.38526	2.83025	1.62279	2.00619	6.03343	2.20373	4.79331			2.49897	1.3934
1.28156	1.89213	1.24117	1.81727	3.15351	0.80282	2.18991	1.24009	3.59802	2.87351	1.55705	1.96566	5.04822	2.10639	4.68636			2.36358	1.26956
0.974551	1.55444	1.07547	1.53422	2.97094	0.678943	1.94985	0.978763	4.24588	2.73439	1.18263	1.90843	4.6219	1.97369	4.39881			2.18553	1.32093
0.802376	1.28756	0.767484	1.39379	2.85162	0.563256	1.80063	0.958869	4.84848	2.62186	1.09332	1.7851	4.15836	1.96772	4.13536			2.06905	1.36952
0.762169	1.08737	0.645274	1.34461	2.82927	0.396751	1.61881	0.962316	5.20103	2.40626	1.08159	1.64333	3.98205	1.75154	4.00232			1.98098	1.42645
0.733101	0.80538	0.551519	1.39883	2.69996	0.269804	1.48186	0.926592	5.46275	2.28704	0.956965	1.41516	3.73378	1.64157	3.92732			1.88611	1.47729
0.683773	0.772305	0.492073	1.37495	2.3997	0.018936	1.4225	1.14436	5.5999	1.98766	0.973843	1.2742	3.17235	1.47848	3.83136			1.77509	1.45982
0.569219	0.820986	0.462684	1.4003	2.24111	-0.015891	1.38734	1.31168	5.57009	1.77257	1.12563	1.09432	3.00475	1.35593	3.6837			1.71896	1.42898
0.439599	0.983842	0.533616	1.50119	2.16441	-0.13569	1.34132	1.42892	5.62159	1.47988	1.31207	1.00439	2.96699	1.15248	3.66598			1.69737	1.44224
0.198092	1.014	0.474369	1.63449	1.91786	-0.210789	1.44003	1.66122	5.7729	1.3183	1.41776	0.912745	2.94905	1.2687	3.58685			1.69037	1.48177
0.10427	1.26191	0.465789	1.77157	1.84831	-0.218719	1.56926	1.91441	5.6146	1.22026	1.6671	0.895274	2.98906	1.2705	3.7206			1.73961	1.4673
-0.02284	1.4912	0.48343	2.17019	1.94582	-0.11192	1.58564	2.0689	5.5745	1.15372	2.04247	1.00547	2.89508	1.41955	3.90123			1.84016	1.46806
-0.15023	1.68634	0.550791	2.39418	2.03624	-0.040785	1.7945	2.35873	5.71659	1.29505	2.23817	1.20968	2.65154	1.67721	4.00591			1.96159	1.48411
-0.184282	2.18241	0.705164	2.82633	2.10685	0.071855	1.89401	2.56773	6.01326	1.31974	2.41443	1.41051	2.55932	1.78823	4.29035			2.13106	1.55059
-0.245206	2.52773	0.887729	3.07565	2.15928	0.342644	2.10194	2.83724	6.0572	1.5585	2.62323	1.58499	2.36645	1.95921	4.41514			2.28345	1.53942
-0.223683	2.99886	1.00558	3.31322	2.46808	0.523144	2.28375	3.01445	6.07011	1.60072	2.74766	1.77453	2.17202	2.14465	4.5894			2.43217	1.54584
-0.121488	3.14264	1.16338	3.63036	2.64678	0.620329	2.46457	3.24504	6.06355	1.73453	3.18662	1.98621	2.16248	2.34154	5.20553			2.63147	1.59643
-0.026906	3.37757	1.4813	3.83107	2.85737	1.23207	2.63899	3.5057	6.00329	2.04181	3.43003	2.26772	2.20673	2.75461	5.50184			2.87355	1.53998
0.04473	3.80848	1.60518	4.09966	3.15695	1.51725	2.88299	3.61978	6.16934	2.1516	3.56767	2.64852	2.30337	2.99433	5.71615			3.08573	1.56127
0.15783	3.86044	1.83747	4.30342	3.28637	1.73431	3.09327	3.78913	6.06882	2.25681	3.89676	2.76166	2.55083	3.19988	5.96075			3.25052	1.53719
0.270626	4.42119	1.89767	4.70627	3.38174	1.90987	3.1715	3.8029	6.02794	2.44055	4.40704	3.0267	2.75193	3.45298	6.47532			3.47628	1.60374
0.486263	4.72767	2.10947	4.82684	3.58751	2.42517	3.37961	4.05954	6.06258	2.97373	4.60505	3.17519	2.89442	3.89277	6.7138			3.72797	1.55872
0.664755	4.95895	2.57517	5.06614	3.82569	2.59389	3.57072	4.27527	5.9406	3.09419	4.86639	3.40204	3.15068	4.06028	6.90773			3.93017	1.51844
0.998645	5.41058	2.80904	5.20809	3.91786	2.90536	3.86305	4.44265	5.72842	3.46412	4.97314	3.73952	3.49829	4.28392	7.118			4.15738	1.44587
1.11938	5.50894	3.00677	5.40769	3.96295	3.0228	4.05016	4.59107	5.66973	3.70911	5.09066	3.88353	3.73346	4.57068	7.36137			4.31255	1.44314
1.33845	5.71101	3.20885	5.76529	4.04405	3.1952	4.17717	5.02741	5.7455	4.29186	5.38999	4.02156	4.06507	4.88995	7.72145			4.57285	1.47061
1.4824	6.02548	3.4011	6.03593	4.27301	3.36366	4.2961	5.2522	5.67782	4.6481	5.55234	4.24157	4.49896	5.03278	7.81529			4.77312	1.45625
1.71008	6.31065	3.70137	6.15271	4.68225	3.46401	4.34297	5.47418	5.63946	4.83289	5.7426	4.68402	4.58546	5.18656	7.87146			4.95871	1.41895
2.0139	6.80229	3.93588	6.46801	4.79514	3.5276	4.61759	5.65415	5.65172	5.09701	5.81118	4.98635	5.11686	5.34471	7.92895			5.18342	1.40243
2.167	6.7815	4.06448	7.02808	4.96699	3.92143	4.86358	5.99922	5.62265	5.53373	6.2549	5.0018	5.275	5.84091	8.14884			5.43134	1.42738
2.36281	7.04042	4.16785	7.2059	5.48549	4.04932	5.09755	6.1308	5.58997	5.62714	6.35029	5.08151	5.35223	6.02999	8.35606			5.59515	1.43454
2.67482	7.33367	4.39091	7.40308	5.51708	4.19106	5.48644	6.35878	5.58886	5.70393	6.39231	5.26943	5.64383	6.35942	8.38672			5.78002	1.40057
2.98092	7.50952	4.82359	7.62314	5.75506	4.41333	5.75374	6.55868	5.64023	6.04656	6.52745	5.35717	5.76257	6.60992	8.71538			6.00515	1.38838
3.12813	7.69159	5.01911	7.87176	6.28123	4.789	5.87084	7.07365	5.72478	6.29129	6.62204	5.51053	5.80549	7.25591	8.90608			6.2561	1.41809
3.34463	8.02216	5.1954	8.43171	6.45677	5.03085	6.06377	7.17944	5.74892	6.38978	7.0594	5.59428	6.07499	7.59119	9.33483			6.50121	1.50324
3.48991	8.08806	5.53176	8.74238	6.61468	5.28398	6.39818	7.27954	5.74576	6.54006	7.15244	5.74996	6.33755	7.88964	9.63697			6.69872	1.52181
3.71725	8.14063	5.83165	8.93951	7.27293	5.42836	6.6332	7.37941	5.78341	6.61604	7.43785	5.9668	6.57912	8.3089	9.81448			6.9233	1.52684
3.90522	8.09065	6.20919	9.2491	7.44255	5.87716	6.85685	7.80896	5.83638	7.09011	7.65392	6.17897	7.1638	8.82663	9.98748			7.2118	1.52742
4.30336	7.9751	6.43558	9.74807	7.68847	5.94526	7.19782	8.0117	5.85665	7.24718	8.048	6.32691	7.38525	9.07044	10.1581			7.42652	1.54323
4.5684	8.10996	6.6018	9.81103	7.74971	6.0921	7.30483	8.15683	5.83117	7.46184	8.00925	6.46466	7.7535	9.22395	10.4188			7.57052	1.54056
4.75966	8.30605	6.89192	9.94953	7.78618	6.32057	7.45452	8.21692	5.82605	7.51038	7.96842	6.53623	8.23894	9.24722	10.3333			7.68973	1.50131
4.88164	8.66344	7.43893	9.88782	7.96329	6.42586	7.57306	8.33528	5.83996	7.71981	7.95312	6.81191	8.28259	9.10696	10.5325			7.82774	1.4699
5.07217	8.70914	7.62643	9.96004	8.23821	6.48587	7.71315	8.38974	5.85641	7.9344	7.97104	7.05158	8.63663	8.99446	10.4373			7.93844	1.42472
5.25686	8.77996	7.77581	10.2133	8.46231	6.53271	7.86264	8.43218	5.86841	8.02833	8.01959	7.23192	8.89081	8.97253	10.7788			8.07374	1.46795
5.49729	8.85004	8.07472	10.1175	8.65645	6.68018	7.96231	8.55967	5.88404	8.15279	8.15734	7.39511	9.06292	8.92589	11.2539			8.21534	1.48164
5.90978	8.82162	8.41322	10.2348	8.94985	6.70548	8.13699	8.66626	5.85913	8.2698	8.31078	7.73873	9.33649	8.97087	11.6257			8.39663	1.50203
6.0799	8.88238	8.72447	10.3382	9.03785	6.68662	8.20067	8.65294	5.88111	8.64457	8.41364	7.74177	9.52558	9.17722	11.725			8.51413	1.52346
6.22967	8.98666	9.09995	10.3625	8.97633	6.73537	8.25247	8.86576	5.88296	8.69776	8.39361	7.81411	9.41661	9.16253	11.6627			8.56927	1.49608
6.35708	8.99245	9.12312	10.5537	8.98926	6.7293	8.23732	8.99908	5.8499	8.83198	8.41667	7.92976	9.51353	9.13575	11.6644			8.62156	1.50765
6.59153	9.08669	9.30976	10.6737	9.05962	6.74496	8.24851	9.07615	5.87538	8.70112	8.40404	7.98316	9.66621	9.21031	11.6256			8.68378	1.49972
6.70652	9.04511	9.50673	10.7633	9.11202	6.66985	8.34661	9.00615	5.89738	8.72315	8.21114	8.01834	9.71645	9.28016	11.8117			8.72097	1.53799
6.90279	9.19043	9.73979	10.6128	9.08027	6.84262	8.27542	9.03327	5.89883	8.72618	8.17499	8.04098	9.7559	9.23561	11.8887			8.7599	1.51585
6.96856	9.20587	9.65803	10.654	9.08788	6.83308	8.35121	9.03284	5.92834	8.81256	8.03983	8.06766	9.89847	9.18685	11.9942			8.78129	1.53098
7.1574	9.22278	9.68989	10.535	8.93562	6.8082	8.39117	9.05171	5.96851	8.93053	8.07469	8.0412	9.71873	9.31628	12.2412			8.80553	1.53492
7.28093	9.312	9.70499	10.425	8.92923	6.93267	8.30696	9.0023	5.96055	9.0509	8.12897	7.97374	9.92277	9.34972	12.4848			8.85104	1.56244
7.41438	9.04592	9.65988	10.3849	8.72259	6.92014	8.41732	9.04523	5.98906	8.93936	8.04026	8.15408	10.0799	9.40936	12.4225			8.84299	1.53525
7.46479	8.99763	9.83602	10.3635	8.71651	6.82909	8.43015	9.01553	6.00024	8.92326	8.15722	8.07962	9.83455	9.40441	12.5362			8.83925	1.54855
7.49485	8.9909	9.90785	10.1375	8.44065	6.89908	8.49277	9.08652	6.00497	8.82461	7.89274	8.12677	10.0037	9.57862	12.6279			8.83396	1.56878
7.59449	8.83856	9.83662	10.0575	8.468	6.82724	8.58726	8.93159	5.99837	8.82097	8.01865	8.13494	9.99512	9.41238	12.5276			8.80329	1.53008
7.78232	8.86851	9.92979	9.89612	8.48272	6.86688	8.64228	8.92347	5.96551	8.87276	7.93703	8.14527	9.87486	9.4066	12.5611			8.81035	1.51838
7.93445	8.58173	9.73953	9.80265	8.19856	6.93173	8.68301	8.7462	5.91935	8.82081	7.81707	8.17705	9.84001	9.33655	12.3212			8.72333	1.46108
7.98139	8.62481	9.66414	9.57714	8.13462	6.85518	8.72603	8.66129	5.92911	8.74053	7.74672	8.16837	9.91029	9.33725	12.2601			8.6878	1.44814
8.03025	8.43317	9.53825	9.60668	8.12246	6.75481	8.60929	8.61146	5.92425	8.73031	7.55532	8.1133	9.80045	9.2759	12.2716			8.62517	1.45781
8.07203	8.19207	9.41782	9.42946	7.88431	6.81308	8.52171	8.4047	5.90319	8.79113	7.44658	8.02727	9.7902	9.35765	12.068			8.54128	1.42641
8.05308	8.17644	9.2536	9.36263	7.81912	6.80817	8.48086	8.33174	5.9412	8.66359	7.52686	7.94447	9.86426	9.28103	12.0053			8.50082	1.40303
8.21603	8.15144	9.04297	9.24147	7.71069	6.71624	8.4405	8.26595	5.93255	8.59128	7.46485	8.01652	9.75895	9.26586	12.0436			8.45726	1.40196
8.29855	8.06691	8.72859	9.0825	7.5335	6.79531	8.30902	8.24077	5.93886	8.55917	7.47411	7.91672	9.76446	9.28722	11.8337			8.38863	1.35397
8.43728	8.04058	8.53321	9.04133	7.45371	6.6378	8.21597	8.08839	5.94833	8.52288	7.49643	7.97443	9.76722	9.25129	11.8779			8.35245	1.37244
8.60113	7.71371	8.53529	9.03858	7.36501	6.57308	8.11817	7.83688	5.96618	8.33966	7.4141	7.91184	9.8103	9.10607	11.6967			8.26844	1.36214
8.62071	7.66474	8.35153	8.96044	7.23976	6.7132	8.1179	7.83813	5.95684	8.32989	7.39826	7.98029	9.70746	9.14305	11.7162			8.24923	1.35129
8.5016	7.56488	8.04008	8.77466	7.35982	6.59841	7.9548	7.67326	5.94073	8.1353	7.38504	7.87898	9.80282	9.10796	11.708			8.16175	1.36308
8.31716	7.50298	7.75509	8.81374	7.22995	6.41633	7.908	7.59405	5.9405	8.14003	7.43017	7.70632	9.7744	9.00425	11.6522			8.07901	1.37368
8.31526	7.47121	7.76782	8.72396	7.18657	6.56297	7.88103	7.53402	5.9108	8.10398	7.30057	7.4223	9.78874	9.06039	11.581			8.04071	1.36894
7.92517	7.6193	7.63366	8.60623	7.11337	6.54156	7.64911	7.4507	5.92307	8.04144	7.30187	7.42387	9.72408	9.12308	11.701			7.98517	1.39008
7.62549	7.66372	7.58019	8.50443	7.05472	6.51649	7.62841	7.39919	5.93929	8.08854	7.2423	7.35692	9.73166	9.10103	11.7551			7.94583	1.40882
7.30644	7.72436	7.38072	8.35135	6.79794	6.40447	7.53889	7.32042	5.93231	7.99705	7.1596	7.33263	9.72562	9.16639	11.7856			7.86158	1.45252
7.01251	7.85467	7.3024	8.37349	6.87439	6.32806	7.57644	7.21943	5.95392	7.99092	7.06025	7.31949	9.70166	9.07544	11.7067			7.82332	1.44741

## Sheet: Ankle z
Angle																	Mena	SD
-26.3228	-31.6803	-25.4511	-28.6331	-35.8268	-29.2609	-27.9084	-25.8248	-34.8479	-32.0349	-31.1142	-29.761	-31.4644	-35.9031	-34.7518			-30.719	3.54529
-25.9081	-30.4976	-24.9877	-28.0786	-35.8796	-28.3243	-27.4463	-24.8199	-34.5219	-31.9558	-30.6007	-29.4663	-31.6214	-35.5612	-34.4609			-30.2754	3.72036
-25.626	-30.3854	-23.6232	-27.5901	-35.6814	-27.1578	-26.6556	-23.2479	-32.8185	-31.684	-28.9279	-28.8901	-31.7135	-34.8552	-33.5398			-29.4931	3.88431
-25.345	-29.4626	-23.1043	-27.0858	-35.6727	-26.6106	-26.6114	-22.5823	-31.809	-31.7042	-28.1904	-28.2433	-31.8692	-34.2106	-32.7416			-29.0162	3.91821
-24.1779	-27.6924	-22.1185	-26.628	-35.3885	-25.9293	-26.2226	-22.3656	-29.1045	-31.22	-26.9811	-27.543	-32.0187	-33.6323	-32.1858			-28.2139	3.98662
-23.4103	-26.7375	-21.7584	-26.2501	-34.3725	-25.2042	-25.9589	-22.0375	-24.9903	-30.3067	-26.0254	-25.0582	-32.5102	-33.5341	-31.6042			-27.3172	4.112
-22.9981	-26.2175	-20.9639	-25.8765	-34.3362	-23.7268	-25.7256	-22.1176	-22.9796	-28.5502	-25.5969	-24.5415	-33.0608	-31.5534	-30.7074			-26.5968	4.13757
-22.5251	-24.6753	-20.012	-24.6312	-33.7822	-23.1635	-25.2343	-21.9194	-21.3142	-28.4048	-24.6404	-23.2544	-33.2392	-30.5099	-29.8936			-25.8133	4.32529
-22.0108	-24.5888	-19.4872	-23.8883	-32.3081	-22.5063	-24.9629	-21.6158	-17.0895	-27.735	-24.7834	-23.3298	-33.2727	-29.6999	-29.4019			-25.112	4.58586
-21.2829	-23.6633	-18.8127	-23.0584	-31.7512	-21.8716	-24.4564	-21.6006	-13.7698	-27.6192	-24.617	-23.5949	-33.4022	-29.4136	-29.239			-24.5435	5.10526
-20.4584	-22.9093	-17.7267	-22.2906	-30.8744	-20.3838	-23.5464	-20.2381	-12.2759	-27.1579	-24.2466	-24.0965	-32.751	-28.3061	-28.6785			-23.7294	5.30571
-18.4643	-22.0832	-16.8755	-20.2219	-29.099	-19.6384	-21.9337	-19.0876	-10.9917	-27.0277	-22.2809	-24.3606	-32.7266	-27.6282	-28.1134			-22.7022	5.57556
-17.3994	-20.1697	-15.465	-19.3134	-28.0504	-18.489	-20.7054	-17.7724	-10.199	-27.3611	-20.6776	-23.6783	-32.5053	-27.0104	-28.4786			-21.8183	5.93076
-16.6721	-19.54	-14.6595	-18.4268	-27.3557	-16.8104	-19.5714	-16.2044	-9.42195	-26.7561	-18.8374	-22.2992	-31.4495	-26.345	-27.6714			-20.8014	6.01129
-16.2305	-18.4774	-14.0326	-17.5212	-25.6232	-15.8034	-18.7657	-15.6482	-8.22429	-26.5232	-17.4037	-18.7674	-30.7851	-25.6862	-27.2975			-19.786	6.08672
-15.613	-17.6853	-13.2396	-16.6942	-25.3049	-15.3765	-17.7094	-14.8601	-7.44344	-25.3853	-16.2463	-17.7224	-28.7779	-23.4111	-26.7225			-18.8128	5.86212
-15.0854	-16.8147	-12.5863	-15.5357	-24.7811	-14.6206	-17.2084	-14.2246	-7.98053	-24.5678	-14.3078	-16.7779	-27.9511	-21.9197	-25.3858			-17.9831	5.63884
-14.4777	-15.5143	-11.9142	-15.0403	-23.5274	-13.145	-16.3476	-12.8378	-8.96543	-23.3731	-13.7295	-15.8846	-27.2795	-20.565	-24.8071			-17.1606	5.40861
-12.4427	-14.6599	-11.6547	-14.5036	-22.8755	-11.9634	-14.8648	-12.5896	-11.4105	-22.536	-12.8164	-15.1975	-27.6821	-19.3667	-23.8792			-16.5628	5.28984
-11.7563	-14.1871	-11.3811	-14.3407	-21.2889	-10.8323	-14.6444	-12.1811	-13.1252	-20.1647	-12.2427	-14.6794	-28.1821	-17.5439	-23.25			-15.9867	5.08006
-10.9339	-13.3682	-11.062	-13.332	-19.6278	-9.87725	-14.5914	-12.0419	-15.2333	-19.1011	-11.3651	-14.0654	-28.6977	-16.6266	-22.6971			-15.5081	5.14552
-10.4601	-12.9755	-10.4499	-12.7975	-18.8472	-8.70101	-14.3574	-11.1357	-16.6039	-17.8803	-11.2297	-13.5578	-28.0855	-15.5726	-22.2186			-14.9915	5.14725
-9.99124	-12.2286	-10.2701	-12.3261	-18.0582	-8.05366	-13.9066	-10.7243	-17.5617	-17.0586	-11.1679	-13.1347	-27.3598	-14.9334	-22.1258			-14.5934	5.13672
-9.72056	-11.9303	-9.90289	-11.7409	-16.7328	-7.90939	-13.7899	-10.2792	-19.2228	-15.2938	-11.2705	-12.6261	-26.0234	-14.3422	-22.3147			-14.2066	5.03134
-9.16847	-11.6378	-9.19032	-11.3966	-16.3869	-7.84715	-13.2592	-9.47557	-20.0369	-15.4396	-11.023	-12.4682	-23.0433	-13.9833	-21.9855			-13.7561	4.7644
-7.86359	-10.5555	-8.58105	-10.4393	-15.7653	-7.36795	-12.3583	-8.47742	-22.4623	-14.9698	-9.6054	-12.2449	-21.7086	-13.4922	-21.0927			-13.1323	5.10948
-7.12801	-9.69444	-7.44328	-9.962	-15.3569	-6.91945	-11.795	-8.4012	-24.6424	-14.5882	-9.26535	-11.7625	-20.2275	-13.47	-20.2648			-12.7281	5.40049
-6.95587	-9.04544	-6.99006	-9.7945	-15.2802	-6.27241	-11.1055	-8.41441	-25.8829	-13.8533	-9.22065	-11.2058	-19.6561	-12.6654	-19.8431			-12.4124	5.63094
-6.83134	-8.12713	-6.64175	-9.97914	-14.8353	-5.77796	-10.5839	-8.27748	-26.7867	-13.4448	-8.7449	-10.3052	-18.8445	-12.254	-19.6043			-12.0692	5.83091
-6.61987	-8.01913	-6.42063	-9.89787	-13.7951	-4.7983	-10.3572	-9.11059	-27.2545	-12.4127	-8.8094	-9.74606	-16.9788	-11.6414	-19.2978			-11.6773	5.8016
-6.12806	-8.17807	-6.31124	-9.98414	-13.2417	-4.66205	-10.2228	-9.74801	-27.1532	-11.6658	-9.38845	-9.02982	-16.4141	-11.1793	-18.8237			-11.4754	5.71399
-5.57044	-8.70884	-6.57518	-10.3271	-12.9732	-4.19299	-10.0467	-10.1932	-27.3281	-10.6428	-10.097	-8.67061	-16.2864	-10.4087	-18.7666			-11.3859	5.76882
-4.52866	-8.80697	-6.35473	-10.7791	-12.1058	-3.89864	-10.4242	-11.0714	-27.8389	-10.0749	-10.4972	-8.3038	-16.2257	-10.8494	-18.5113			-11.3514	5.94094
-4.12308	-9.61141	-6.3228	-11.2424	-11.86	-3.86754	-10.917	-12.0223	-27.3044	-9.72933	-11.4371	-8.2338	-16.3611	-10.8562	-18.9425			-11.5221	5.89714
-3.57292	-10.3519	-6.38846	-12.5807	-12.2044	-4.28611	-10.9793	-12.5992	-27.1682	-9.49435	-12.8399	-8.6749	-16.0427	-11.4194	-19.5211			-11.8749	5.90178
-3.02087	-10.9793	-6.63904	-13.3265	-12.523	-4.56464	-11.7719	-13.6743	-27.6494	-9.99304	-13.5649	-9.48951	-15.2129	-12.3874	-19.8545			-12.3101	5.97008
-2.8732	-12.5612	-7.21228	-14.7517	-12.7712	-5.00522	-12.1478	-14.4433	-28.64	-10.08	-14.2141	-10.2867	-14.8969	-12.8023	-20.753			-12.8959	6.16236
-2.60891	-13.6508	-7.88827	-15.5653	-12.9552	-6.06178	-12.9298	-15.4268	-28.7851	-10.9184	-14.9782	-10.9761	-14.2328	-13.4385	-21.1437			-13.4373	6.10516
-2.70229	-15.1202	-8.32345	-16.3344	-14.0329	-6.76373	-13.6094	-16.0683	-28.8277	-11.0661	-15.4308	-11.7211	-13.5592	-14.1245	-21.6858			-13.958	6.08467
-3.14548	-15.5645	-8.90457	-17.3512	-14.6518	-7.14082	-14.2814	-16.8967	-28.8061	-11.5333	-17.0111	-12.5483	-13.526	-14.8483	-23.568			-14.6518	6.18756
-3.55531	-16.2862	-10.0694	-17.9887	-15.3766	-9.49847	-14.9257	-17.8241	-28.607	-12.6	-17.8759	-13.6399	-13.6798	-16.3503	-24.4538			-15.5154	5.94172
-3.86547	-17.5954	-10.521	-18.8343	-16.3986	-10.5867	-15.8203	-18.2269	-29.1536	-12.979	-18.3611	-15.0999	-14.0147	-17.2113	-25.0865			-16.2503	5.96335
-4.35467	-17.7519	-11.3641	-19.47	-16.8367	-11.4097	-16.5848	-18.8213	-28.8234	-13.341	-19.5096	-15.5299	-14.8677	-17.943	-25.8003			-16.8272	5.83815
-4.8419	-19.4229	-11.5817	-20.7115	-17.1582	-12.0718	-16.8676	-18.8694	-28.6885	-13.9705	-21.2573	-16.5297	-15.5558	-18.8354	-27.2729			-17.5757	5.94503
-5.77131	-20.3214	-12.3447	-21.079	-17.848	-13.9951	-17.6158	-19.7614	-28.8029	-15.7767	-21.9243	-17.0853	-16.0405	-20.3628	-27.9418			-18.4447	5.72514
-6.53829	-20.9922	-14.0059	-21.8028	-18.6394	-14.6179	-18.2972	-20.5032	-28.3991	-16.1803	-22.7948	-17.9275	-16.906	-20.9366	-28.4795			-19.1347	5.50139
-7.96632	-22.284	-14.831	-22.2286	-18.9437	-15.758	-19.3288	-21.0738	-27.6893	-17.409	-23.147	-19.1651	-18.0669	-21.6955	-29.056			-19.9095	5.12252
-8.48027	-22.5621	-15.5236	-22.8227	-19.0921	-16.1846	-19.9821	-21.5759	-27.4912	-18.2133	-23.5327	-19.6876	-18.8434	-22.6567	-29.7149			-20.4242	5.05048
-9.40923	-23.1297	-16.2264	-23.8737	-19.3584	-16.8072	-20.4224	-23.0311	-27.7468	-20.0955	-24.5043	-20.185	-19.9257	-23.7105	-30.6734			-21.2733	5.03485
-10.0169	-24.003	-16.8903	-24.6574	-20.1052	-17.4116	-20.8323	-23.7685	-27.5185	-21.2236	-25.0248	-20.9711	-21.3187	-24.1764	-30.9199			-21.9226	4.89791
-10.9732	-24.7843	-17.9175	-24.9924	-21.4217	-17.7697	-20.9932	-24.4881	-27.3887	-21.8018	-25.6291	-22.5263	-21.5932	-24.674	-31.0669			-22.5347	4.69163
-12.2393	-26.1072	-18.7112	-25.8874	-21.7806	-17.9958	-21.9289	-25.0654	-27.4302	-22.6198	-25.8453	-23.5686	-23.2557	-25.1815	-31.2168			-23.2556	4.50134
-12.8727	-26.0518	-19.1433	-27.4424	-22.3233	-19.3829	-22.7563	-26.1565	-27.3318	-23.9503	-27.2247	-23.6215	-23.7423	-26.7454	-31.7855			-24.0354	4.50107
-13.6781	-26.7368	-19.4888	-27.9268	-23.9343	-19.8282	-23.5337	-26.5671	-27.2208	-24.2313	-27.5167	-23.8933	-23.9786	-27.3299	-32.3148			-24.5453	4.41256
-14.9497	-27.5022	-20.2293	-28.4586	-24.0311	-20.3187	-24.805	-27.2712	-27.217	-24.4612	-27.6448	-24.5293	-24.8626	-28.3332	-32.3926			-25.1338	4.20863
-16.1822	-27.9558	-21.6448	-29.0456	-24.7557	-21.0814	-25.6635	-27.8811	-27.3913	-25.4767	-28.0548	-24.8241	-25.2189	-29.083	-33.2174			-25.8318	4.03065
-16.7695	-28.4213	-22.2752	-29.7003	-26.3267	-22.3522	-26.0356	-29.4197	-27.677	-26.1913	-28.3397	-25.3358	-25.3471	-30.965	-33.6886			-26.5897	4.06625
-17.6264	-29.2554	-22.8386	-31.1424	-26.8412	-23.1578	-26.6433	-29.7299	-27.7583	-26.4763	-29.6369	-25.6133	-26.1458	-31.9125	-34.7282			-27.3004	4.16409
-18.1968	-29.42	-23.9001	-31.9231	-27.2998	-23.9904	-27.6809	-30.0216	-27.7476	-26.9083	-29.9085	-26.1257	-26.9131	-32.739	-35.4447			-27.8813	4.12604
-19.0816	-29.5509	-24.8315	-32.4114	-29.1694	-24.4603	-28.3981	-30.3109	-27.8742	-27.1255	-30.732	-26.8317	-27.6096	-33.8736	-35.8594			-28.5413	4.07495
-19.806	-29.4265	-25.9835	-33.167	-29.64	-25.8979	-29.0713	-31.5348	-28.0517	-28.4603	-31.3458	-27.5137	-29.2573	-35.2321	-36.2592			-29.3765	4.01795
-21.3179	-29.1376	-26.6633	-34.3564	-30.3141	-26.113	-30.0803	-32.1012	-28.1194	-28.8949	-32.4439	-27.9842	-29.8673	-35.8559	-36.6493			-29.9932	3.95672
-22.307	-29.4746	-27.157	-34.504	-30.4805	-26.5739	-30.3926	-32.5021	-28.0342	-29.4828	-32.3372	-28.4185	-30.8645	-36.2434	-37.2373			-30.4006	3.85452
-23.012	-29.9605	-28.008	-34.8267	-30.5793	-27.2834	-30.826	-32.667	-28.0171	-29.6148	-32.2244	-28.6426	-32.1465	-36.3018	-37.0455			-30.7437	3.66591
-23.4576	-30.8331	-29.5748	-34.6832	-31.0562	-27.6072	-31.1663	-32.99	-28.0636	-30.1799	-32.182	-29.4968	-32.26	-35.9484	-37.4907			-31.1327	3.47342
-24.1476	-30.9435	-30.1006	-34.8511	-31.7865	-27.7909	-31.5653	-33.1378	-28.1186	-30.7521	-32.2316	-30.2275	-33.1693	-35.6626	-37.2787			-31.4509	3.29178
-24.8091	-31.1141	-30.5152	-35.4339	-32.373	-27.9339	-31.9871	-33.2526	-28.1587	-31.0003	-32.3657	-30.7699	-33.8102	-35.6066	-38.0334			-31.8109	3.31968
-25.6595	-31.2822	-31.334	-35.2145	-32.8747	-28.3813	-32.2661	-33.5956	-28.2109	-31.3271	-32.7438	-31.2553	-34.2384	-35.4873	-39.0568			-32.1952	3.27641
-27.0897	-31.2141	-32.2434	-35.4829	-33.6217	-28.4576	-32.7508	-33.8802	-28.1277	-31.6321	-33.1611	-32.2607	-34.9098	-35.6024	-39.8362			-32.6847	3.25752
-27.6688	-31.3596	-33.0631	-35.7181	-33.8431	-28.4007	-32.9261	-33.8447	-28.2011	-32.5951	-33.4385	-32.2695	-35.3671	-36.1259	-40.0412			-32.9908	3.27282
-28.1735	-31.6081	-34.031	-35.7732	-33.6885	-28.5477	-33.0682	-34.4075	-28.2073	-32.7301	-33.3846	-32.4782	-35.1042	-36.0889	-39.9128			-33.1469	3.1754
-28.5989	-31.6219	-34.09	-36.2035	-33.721	-28.5294	-33.0267	-34.7561	-28.0969	-33.0687	-33.4466	-32.8098	-35.3381	-36.0213	-39.9163			-33.283	3.18276
-29.3726	-31.8452	-34.562	-36.471	-33.8977	-28.5766	-33.0573	-34.9562	-28.182	-32.7386	-33.4126	-32.962	-35.7037	-36.2091	-39.8359			-33.4522	3.13855
-29.7477	-31.7468	-35.054	-36.6694	-34.0288	-28.35	-33.3252	-34.7745	-28.2553	-32.7944	-32.8906	-33.062	-35.8233	-36.3843	-40.2192			-33.5417	3.22353
-30.3813	-32.0898	-35.6282	-36.3355	-33.9494	-28.8696	-33.131	-34.845	-28.2602	-32.802	-32.792	-33.1263	-35.9169	-36.2727	-40.3763			-33.6517	3.12734
-30.5917	-32.1261	-35.4278	-36.4271	-33.9685	-28.841	-33.3377	-34.8439	-28.3584	-33.0199	-32.4215	-33.2018	-36.2532	-36.1501	-40.5905			-33.7039	3.14599
-31.1906	-32.1658	-35.506	-36.1616	-33.5858	-28.7665	-33.4463	-34.8929	-28.4918	-33.3156	-32.5173	-33.1269	-35.8287	-36.4746	-41.0861			-33.7704	3.15686
-31.5782	-32.3746	-35.5431	-35.9144	-33.5696	-29.1382	-33.2171	-34.7645	-28.4654	-33.6151	-32.6662	-32.9352	-36.3102	-36.5579	-41.5671			-33.8811	3.18696
-31.9932	-31.7488	-35.4323	-35.8239	-33.0443	-29.101	-33.5172	-34.876	-28.5599	-33.3376	-32.4227	-33.4456	-36.6767	-36.7061	-41.4448			-33.8753	3.19483
-32.149	-31.6342	-35.8628	-35.7755	-33.0287	-28.8291	-33.5519	-34.7989	-28.597	-33.2974	-32.7435	-33.2356	-36.1028	-36.6939	-41.6676			-33.8645	3.23167
-32.2416	-31.6182	-36.037	-35.2605	-32.3167	-29.0382	-33.7211	-34.983	-28.6126	-33.0502	-32.0145	-33.3687	-36.4995	-37.1235	-41.8461			-33.8488	3.32187
-32.5472	-31.2547	-35.8643	-35.0765	-32.3878	-28.8236	-33.975	-34.58	-28.5908	-33.041	-32.3631	-33.3917	-36.4795	-36.7136	-41.6509			-33.7826	3.25775
-33.1175	-31.3264	-36.09	-34.7026	-32.426	-28.9421	-34.1221	-34.5588	-28.4819	-33.171	-32.1375	-33.4209	-36.1977	-36.6993	-41.7162			-33.8073	3.24275
-33.5737	-30.6351	-35.6276	-34.4844	-31.6819	-29.1355	-34.2307	-34.0923	-28.3285	-33.0406	-31.8037	-33.5102	-36.1157	-36.5251	-41.2448			-33.602	3.1915
-33.7136	-30.7396	-35.4428	-33.9529	-31.5127	-28.9072	-34.345	-33.867	-28.361	-32.8383	-31.6068	-33.4858	-36.2809	-36.5269	-41.1235			-33.5136	3.19575
-33.8586	-30.2728	-35.1322	-34.0229	-31.4805	-28.6062	-34.034	-33.7341	-28.3448	-32.8124	-31.0667	-33.3308	-36.0223	-36.3736	-41.1465			-33.3492	3.24692
-33.9821	-29.6787	-34.8327	-33.601	-30.8442	-28.7811	-33.799	-33.1783	-28.2747	-32.9659	-30.7569	-33.0874	-35.9981	-36.5777	-40.7392			-33.1398	3.24689
-33.9261	-29.6399	-34.4206	-33.4407	-30.6684	-28.7664	-33.689	-32.9804	-28.4012	-32.6434	-30.9858	-32.8518	-36.1728	-36.3865	-40.6128			-33.039	3.19617
-34.4053	-29.5778	-33.8856	-33.1486	-30.3746	-28.4901	-33.5799	-32.8011	-28.3724	-32.4595	-30.8091	-33.0569	-35.9241	-36.3485	-40.6903			-32.9283	3.24518
-34.6458	-29.3673	-33.0739	-32.7621	-29.8904	-28.7279	-33.2228	-32.7323	-28.3934	-32.3776	-30.8355	-32.7725	-35.9372	-36.402	-40.2642			-32.7603	3.18995
-35.0468	-29.3015	-32.5613	-32.6614	-29.6708	-28.2531	-32.9681	-32.3135	-28.4248	-32.2848	-30.8992	-32.9372	-35.9437	-36.312	-40.3543			-32.6622	3.27473
-35.5153	-28.4776	-32.5668	-32.6547	-29.4254	-28.0567	-32.6988	-31.6133	-28.4841	-31.8133	-30.664	-32.7586	-36.0456	-35.9462	-39.9828			-32.4469	3.33549
-35.5709	-28.3529	-32.0791	-32.4629	-29.0768	-28.4809	-32.698	-31.6168	-28.4531	-31.788	-30.6186	-32.9539	-35.8019	-36.0397	-40.0231			-32.4011	3.3382
-35.2314	-28.0978	-31.2398	-32.0035	-29.411	-28.1337	-32.2451	-31.1517	-28.3996	-31.2813	-30.5807	-32.6645	-36.0279	-35.951	-40.0061			-32.1617	3.38224
-34.6998	-27.939	-30.4579	-32.1005	-29.0494	-27.578	-32.1143	-30.9266	-28.3988	-31.2937	-30.71	-32.1669	-35.9607	-35.6876	-39.891			-31.9316	3.40416
-34.6943	-27.8574	-30.4931	-31.8772	-28.928	-28.026	-32.0387	-30.7552	-28.3001	-31.1992	-30.3377	-31.3357	-35.9946	-35.8304	-39.7434			-31.8274	3.39291
-33.5461	-28.237	-30.1207	-31.5827	-28.7225	-27.9608	-31.3833	-30.5163	-28.3409	-31.0348	-30.3414	-31.3404	-35.8414	-35.9892	-39.9918			-31.6633	3.38315
-32.6418	-28.3503	-29.9714	-31.3264	-28.5572	-27.8844	-31.3244	-30.368	-28.3948	-31.1587	-30.1693	-31.1422	-35.8594	-35.9334	-40.1031			-31.5457	3.39047
-31.6578	-28.5046	-29.4105	-30.9382	-27.8272	-27.5416	-31.0685	-30.1402	-28.3716	-30.9178	-29.9293	-31.0701	-35.8451	-36.0986	-40.1656			-31.2991	3.50677
-30.7318	-28.8346	-29.1884	-30.9946	-28.0457	-27.3065	-31.176	-29.8467	-28.4434	-30.9016	-29.6394	-31.031	-35.7881	-35.8686	-40.0036			-31.1867	3.45733
