# Supplementary material for: The kinematic analysis of the lower limb during topspin forehand loop between different level table tennis athletes
Source: PeerJ. 2021 Mar 12;9:e10841. doi: 10.7717/peerj.10841 (PMC7958893; doi:10.7717/peerj.10841)
Supplement: Supplemental Information 5 [file peerj-09-10841-s005.xlsx]

## Sheet: Sheet1
Level Ⅰ	BS	FS	Time of entire phase		Level Ⅱ	BS	FS	Time of entire phase
	0.4	0.75	1.15			0.5	0.46	0.96
	0.44	0.61	1.05			0.51	0.53	1.04
	0.44	0.54	0.98			0.42	0.56	0.98
	0.34	0.54	0.88			0.43	0.63	1.06
	0.32	0.59	0.91			0.54	0.53	1.07
	0.35	0.66	1.01			0.48	0.54	1.02
	0.49	0.65	1.14			0.4	0.51	0.91
	0.5	0.44	0.94			0.42	0.51	0.93
	0.34	0.56	0.9			0.44	0.55	0.99
	0.39	0.54	0.93			0.44	0.44	0.88
	0.41	0.52	0.93			0.4	0.41	0.81
	0.37	0.55	0.92			0.39	0.44	0.83
	0.31	0.55	0.86			0.56	0.59	1.15
	0.36	0.54	0.9			0.43	0.59	1.02
	0.36	0.54	0.9			0.41	0.48	0.89
