# Supplementary material for: The kinematic analysis of the lower limb during topspin forehand loop between different level table tennis athletes
Source: PeerJ. 2021 Mar 12;9:e10841. doi: 10.7717/peerj.10841 (PMC7958893; doi:10.7717/peerj.10841)
Supplement: Supplemental Information 6 [file peerj-09-10841-s006.xlsx]

## Sheet: Sheet1
EA
Height (CM)	Weight (KG)	Experience (Year)	Age (Year)
180.5	82.4	15	25
173.7	70	9	21
172.4	69.5	11	22
167.2	60.4	8	21
173	67.5	9	21
MA
Height (CM)	Weight (KG)	Experience (Year)	Age (Year)
168.5	60.2	7	22
170.5	63.4	14	25
172.4	66.8	9	21
175.8	81.1	8	20
172.5	74.5	7	21
